# Supplementary material for: Variations in early life history traits of Japanese anchovy Engraulis japonicus in the Yangtze River Estuary
Source: PeerJ. 2018 May 30;6:e4789. doi: 10.7717/peerj.4789 (PMC5984580; doi:10.7717/peerj.4789)
Supplement: Supplemental Information 3 — Standard length (mm), weight (g), increment number and width of each increment (µm) for each anchovy in Station 29 and 30. [file peerj-06-4789-s003.xls]

## Sheet: Station_29_otolith
Specimen_No.	Standard_length	Weight	Increment_number	Increment_1	Increment_2	Increment_3	Increment_4	Increment_5	Increment_6	Increment_7	Increment_8	Increment_9	Increment_10	Increment_11	Increment_12	Increment_13	Increment_14	Increment_15	Increment_16	Increment_17	Increment_18	Increment_19	Increment_20	Increment_21	Increment_22	Increment_23	Increment_24	Increment_25	Increment_26	Increment_27	Increment_28	Increment_29	Increment_30	Increment_31	Increment_32	Increment_33	Increment_34	Increment_35	Increment_36	Increment_37	Increment_38	Increment_39	Increment_40	Increment_41	Increment_42	Increment_43	Increment_44	Increment_45	Increment_46
1208051	23.34	0.0242	44	4.91917	2.9063	2.60824	2.9063	3.3785	2.9063	2.9063	1.8381	2.87471	3.63876	2.43627	2.2714	2.57299	3.0369	3.33771	2.57299	3.73779	3.55626	4.21433	4.80175	4.80175	3.08167	4.21433	4.32659	4.03162	3.73779	4.6225	4.21433	4.6225	6.81755	4.21433	3.85208	2.96847	4.21433	4.21433	3.44541	5.46023	3.55626	4.39984	3.73779	3.55626	3.73779	4.69113	3.26161
1208052	22.7	0.0198	42	6.2113	2.14741	2.36012	2.35043	1.93491	2.14741	2.13675	1.93491	2.14741	3.21224	4.19805	4.5277	4.66674	3.99178	3.3785	4.66674	4.14882	4.10457	5.34188	5.04292	4.87254	5.04292	5.34188	4.57285	4.2735	3.20513	5.17253	4.74436	5.17253	4.74436	4.57285	4.57285	2.9063	3.50453	4.10457	2.9063	3.80438	5.81259	3.20513	4.10457	3.20513	3.80438
1208053	23.47	0.0243	47	5.77319	1.96999	1.66886	1.36819	1.20873	1.36819	1.36819	1.06838	2.01581	2.43627	2.13675	3.20513	2.9063	3.0369	2.13675	2.9063	2.73638	2.31125	3.20513	3.80438	2.73638	4.74436	4.2735	3.80438	3.97459	4.2735	3.50453	3.97459	5.17253	4.57285	6.58245	4.10457	3.97459	4.87254	3.97459	3.97459	4.10457	3.3785	3.80438	3.97459	3.15488	3.15488	4.49226	2.67734	3.92256	4.30013
1208054	20.3	0.0118	41	4.83492	2.11528	1.81309	1.81309	1.51091	1.36819	1.51091	1.20873	1.81309	1.20873	1.51091	1.51091	2.41746	2.41746	2.71964	2.11528	1.51091	2.11528	3.02182	2.57299	3.02182	3.62619	3.62619	2.60824	3.08167	3.26161	4.32659	4.32659	3.85208	3.08167	3.55626	3.26161	4.03162	3.73779	3.08167	2.49186	2.49186	3.08167	3.26161	4.80175	4.6225
1208055	19.08	0.0113	37	4.70571	2.43627	2.57299	2.43627	3.0369	2.57299	3.33771	2.43627	2.73638	3.17651	3.50453	2.87471	4.40503	3.0369	4.70571	4.70571	3.93998	4.70571	4.40503	4.40503	2.57299	3.33771	4.50748	3.3785	5.27739	3.3785	3.08167	3.55626	4.50748	4.6225	4.14882	5.09695	3.55626	3.55626	4.32659	4.80175	4.6225
1208056	23.8	0.0189	48	6.24063	1.8381	2.60824	2.73638	1.8381	2.73638	2.60824	2.73638	2.9063	2.43627	1.8381	1.8381	1.66886	2.31125	3.0369	2.13675	2.43627	3.3785	3.50453	3.80438	3.97459	3.97459	3.97459	4.57285	4.2735	4.2735	4.87254	4.74436	4.2735	4.57285	3.67621	5.47276	5.60872	3.63876	4.40503	3.33771	3.33771	3.0369	1.96999	3.63876	2.73638	3.0369	3.33771	5.30758	3.0369	3.93998
1208057	17.78	0.0097	41	4.6027	2.77778	2.97615	1.82564	2.30135	2.10446	2.10446	1.82564	2.77778	1.82564	2.10446	1.82564	1.6273	2.57299	2.13675	1.93491	2.78598	3.42547	3.42547	3.42547	2.99907	3.63876	3.63876	4.06545	3.21224	4.27884	3.85208	3.21224	1.93491	1.92308	2.57299	2.78598	3.21224	3.85208	1.93491	2.36012	2.78598	2.35043	2.78598	2.57299	3.42547
1208058	19.58	0.0123	37	6.02094	3.15488	2.67734	3.63248	2.67734	2.96847	2.58185	2.19992	2.19992	2.01581	2.58185	2.96847	2.501	2.10446	1.82564	2.30135	2.77778	2.38896	3.65128	3.05936	4.12675	3.2546	3.2546	4.6027	5.27739	5.75338	4.80175	4.12675	5.00201	4.32659	3.73168	4.12675	2.97615	2.97615	2.501	2.501	2.77778
1208059	22.36	0.0186	38	7.47558	3.85208	2.67734	2.31125	2.31125	2.19992	2.01581	3.17651	2.10446	2.0271	3.73168	2.97615	3.2546	2.77778	2.501	4.40503	4.12675	3.65128	3.45203	4.20891	3.17651	3.92837	3.92837	2.97615	2.64302	3.99178	4.7299	3.99178	4.66674	3.11116	3.58185	3.99178	5.60872	2.85078	2.501	2.64302	2.23083	2.9063
1208060	19.72	0.0182	53	4.7299	1.82564	1.82564	2.0271	1.82564	2.501	2.501	2.97615	1.55558	1.82564	1.82564	2.7028	2.501	2.77778	1.76201	2.10446	2.30135	2.97615	2.77778	2.7028	2.30135	3.73168	3.45203	2.7028	3.11116	2.64302	4.19805	3.52402	3.31713	4.19805	4.61261	5.079	4.40503	4.61261	5.75338	4.87254	5.49357	6.16704	4.87254	4.61261	4.40503	4.19805	2.78598	4.50748	3.21224	4.06545
1208061	21.09	0.0116	40	5.60872	2.43627	2.23083	3.17651	1.96999	2.0271	2.23083	2.0271	2.0271	1.96999	1.6273	1.96999	2.501	1.76201	2.23083	2.77778	2.19992	3.2546	2.19992	4.68626	2.38896	3.82234	3.82234	3.05936	4.01459	3.82234	4.01459	4.01459	3.34455	2.10446	2.67734	3.2546	2.38896	2.77778	4.40503	3.34455	3.2546	3.45203	4.01459	3.73168
1208062	19.31	0.0123	42	6.44223	2.78598	3.02182	3.21224	2.14741	2.36012	2.38896	2.57299	2.57299	3.65753	3.86982	3.21224	3.23349	2.36012	4.32659	4.20891	3.65128	3.45203	3.92837	3.45203	2.97615	3.92837	4.40503	3.2546	4.32659	3.67621	3.0369	3.67621	3.80438	2.01581	3.50453	2.9063	4.10457	2.9063	3.67621	2.9063	2.43627	2.9063	1.96999	2.64302	3.11116	2.43627
1208063	17.53	0.0093	43	4.74436	3.3785	2.9063	2.13675	2.43627	4.74436	1.8381	2.13675	2.31125	1.54083	2.13675	1.8381	2.43627	2.60824	2.9063	3.3785	3.50453	2.13675	3.97459	3.44541	5.16811	6.12246	5.35469	5.64523	6.22965	5.16811	3.15488	3.02182	3.68861	3.93998	3.23349	3.05936	2.81046	2.38896	2.38896	3.05936	3.02182	3.2686	3.02182	2.38896	2.64302	3.23349	2.85078
1208064	19.96	0.0107	36	5.15051	2.59061	4.51729	3.43367	1.96328	1.50576	4.93927	1.71684	1.50576	1.50576	2.38082	5.1196	2.10807	2.10807	3.46653	5.1196	3.01153	3.01153	3.31268	3.61383	3.01153	3.16569	4.21614	3.91499	3.61383	4.81844	2.40922	5.87441	6.02306	5.7219	5.96632	4.90241	4.60675	5.15051	5.73378	5.73378
1208065	14.39	0.0035	29	5.23781	3.6201	2.95836	2.38082	3.14413	2.66822	2.38082	2.38082	2.00894	1.62176	3.14413	3.14413	3.43367	3.33315	2.85699	3.83896	4.70416	2.98886	2.12947	4.70416	2.98126	4.06835	3.83896	3.83896	4.47696	4.28019	4.26426	3.83896	4.26426
1208066	20.93	0.0149	41	8.81612	2.59935	2.72705	2.89639	2.42797	1.66317	2.12947	1.53558	2.30338	2.59935	3.66368	3.36699	2.89639	3.07117	3.66368	3.66368	3.36699	3.66368	3.36699	3.66368	3.36699	3.07117	2.89639	4.13469	3.83896	2.57305	4.58702	3.24351	3.44027	3.24351	3.5249	3.14413	3.6201	3.5249	4.86061	5.04824	3.33315	3.33315	3.33315	3.43367	3.80932
1208067	17.07	0.0084	32	5.93966	3.77343	1.96328	2.63401	3.30583	3.30583	2.22323	2.22323	1.96328	1.96328	2.22323	3.77343	5.47486	2.76831	4.68968	5.53663	4.90241	5.75352	3.6201	3.40716	5.75352	3.10056	3.30583	3.10056	3.30583	4.24294	3.97818	3.77343	3.97818	5.52843	4.65084	3.77343
1208068	18.61	0.0116	42	4.93927	3.25747	2.80088	2.59061	1.96328	2.35208	2.17164	3.25747	2.14009	1.75601	2.59061	3.22248	4.09612	3.25747	3.46653	3.43367	3.88592	4.13469	4.93927	4.13469	3.2505	4.90241	3.07117	3.54415	3.54415	2.77649	3.54415	2.59935	4.01788	3.54415	3.54415	2.77649	2.30338	2.30338	3.07117	3.2505	3.36699	2.77649	3.07117	4.01788	4.31185	4.01788
1208069	16.5	0.0078	38	6.19014	2.72705	2.86491	3.32634	2.26366	1.96328	2.42797	2.56422	2.72705	4.52732	2.56422	1.96328	1.66317	1.96328	2.42797	2.26366	2.26366	1.96328	1.96328	2.42797	1.96328	2.56422	2.86491	3.32634	3.32634	3.32634	3.92655	4.52732	3.62636	3.32634	3.16569	3.02655	3.46653	3.92655	4.98951	4.52732	3.62636	2.86491
1208070	20.64	0.0182	44	5.4056	2.97615	2.43627	2.97615	2.501	3.17651	2.0271	1.82564	2.0271	2.501	2.7028	2.7028	2.30135	2.9063	2.7028	3.45203	3.3785	4.5277	3.85208	3.85208	4.25745	3.85208	4.5277	2.501	2.501	2.7028	2.501	2.501	3.17651	2.9063	4.70085	2.78598	3.4188	2.77778	2.77778	3.21224	3.63248	3.63248	3.85208	3.4188	3.4188	4.06545	4.2735	3.20513
1208071	17.07	0.0068	38	5.44162	2.59935	1.71684	3.72505	3.07117	1.24168	1.83184	1.24168	1.83184	1.71684	1.83184	2.30338	2.59935	2.30338	2.12947	2.77649	2.59935	2.00894	2.89639	2.77649	1.83184	2.59935	2.77649	3.07117	2.89639	3.07117	4.13469	5.07958	3.66368	3.16569	2.26366	2.86491	3.02655	3.76742	2.56422	2.56422	2.56422	2.56422
1208072	21.36	0.0121	41	4.82785	1.96328	3.62636	2.86491	1.96328	2.56422	2.56422	2.26366	2.26366	1.96328	1.66317	1.96328	1.80692	1.66317	1.96328	1.36353	1.80692	1.66317	3.32634	2.86491	2.86491	3.32634	3.16569	3.46653	3.76742	3.46653	3.76742	4.22688	3.76742	3.46653	4.6703	3.46653	4.52732	3.76742	2.86491	3.01153	2.86491	3.16569	3.46653	4.52732	4.06835
1208073	20.16	0.0108	44	4.76164	3.43367	2.17164	2.17164	2.59061	2.38082	3.36699	2.29351	2.76831	2.76831	2.22323	2.57305	2.29351	2.22323	2.29351	2.96601	2.57305	3.16569	3.91499	3.63884	4.31185	3.91499	4.58702	4.51227	4.39002	3.83896	4.39002	4.31185	3.44027	2.96601	3.6201	3.90919	2.66822	2.66822	3.80932	3.2505	3.33315	4.19998	3.14413	2.66822	4.38485	4.09612	4.19998	5.52433
1208074	22.11	0.0188	48	6.26296	2.22323	3.36699	2.49248	2.49248	2.42797	2.49248	1.81942	2.02019	2.42797	2.29351	2.42797	2.02019	3.63884	2.69359	3.10056	4.04039	5.1856	3.83896	3.77343	4.04039	4.51227	5.74957	3.83896	3.40716	3.19421	2.34242	2.35208	2.55537	2.98126	2.98126	2.98126	3.4138	3.40716	3.40716	2.76831	3.4138	3.19421	2.55537	5.11517	4.68484	4.78539	4.39002	2.76831	3.16569	3.91499
1208075	13.42	0.0047	34	4.82785	2.56422	2.40922	2.56422	1.96328	1.96328	1.80692	2.26366	2.86491	1.80692	2.56422	2.86491	3.16569	3.16569	2.56422	2.56422	2.86491	2.86491	3.16569	3.16569	4.06835	2.86491	2.56422	2.89639	2.42797	2.12947	2.12947	2.89639	1.96328	2.59935	2.12947	2.42797	2.59935	3.02655
1208077	14.9	0.0046	40	6.38842	2.42797	2.30338	2.12947	1.66317	2.89639	2.42797	3.66368	3.79142	2.59935	3.19421	2.72705	2.42797	2.59935	2.42797	2.42797	2.59935	2.72705	2.12947	3.66368	2.42797	2.42797	5.12845	2.10807	4.22688	2.56422	3.16569	2.56422	2.56422	2.10807	2.56422	1.96328	1.96328	2.10807	2.26366	2.56422	1.96328	2.56422	2.86491	2.10807
1208078	23.07	0.0207	42	4.39002	2.42797	2.72705	2.42797	2.26366	3.19421	2.72705	3.32634	3.02655	2.42797	2.72705	4.04039	4.24294	4.51227	4.04039	4.44647	4.51227	4.44647	6.14603	5.32368	6.61166	4.5969	3.83896	3.66368	3.96105	4.25894	3.96105	3.96105	3.96105	4.25894	3.19421	2.00894	2.72705	2.30338	2.42797	3.19421	3.19421	3.07117	3.79142	4.13469	4.25894	3.96105
1208080	18.28	0.01	45	5.85895	2.89639	3.10056	1.3468	1.81942	1.3468	1.96328	1.81942	1.55028	1.81942	2.22323	2.02019	2.02019	3.56965	2.02019	3.56965	3.36699	3.77343	3.56965	3.56965	3.36699	3.61383	3.31268	2.40922	3.01153	4.81844	3.31268	2.10807	3.46653	2.71038	2.71038	3.01153	3.01153	2.40922	3.31268	2.71038	2.80088	3.43367	3.43367	2.80088	3.43367	3.01153	3.22248	3.43367	4.09612
1208081	19.01	0.013	47	5.73378	2.19243	2.48337	2.48337	2.00894	1.83184	2.00894	2.66822	2.00894	2.00894	2.77649	2.00894	2.19243	2.59935	2.48337	2.77649	2.95836	2.89639	3.54415	3.83896	3.72505	4.60675	3.36699	4.49213	4.90241	3.54415	4.60675	5.84733	3.83896	3.54415	3.2505	3.54415	4.28548	4.57217	4.09612	3.33315	3.43367	3.33315	3.33315	3.43367	3.6201	3.5249	2.95836	3.6201	2.38082	2.38082
1208082	15.18	0.0058	37	4.85594	2.56422	2.56422	2.12947	1.50576	1.66317	1.96328	1.66317	2.26366	2.72705	2.56422	2.72705	2.26366	3.02655	2.86491	2.72705	3.32634	3.76742	3.62636	3.32634	3.32634	3.92655	3.02655	3.62636	1.24168	2.19243	2.00894	2.00894	2.19243	1.53558	1.24168	2.19243	2.00894	2.48337	2.77649	2.48337	3.43367
1208083	18.01	0.0105	41	3.97818	3.04894	2.42797	1.96328	2.22323	1.29531	1.75601	2.02019	1.75601	1.96328	1.55028	1.55028	2.84107	2.42797	1.55028	2.38082	2.22323	3.51202	2.17164	3.43367	2.66822	2.66822	2.85699	2.95836	3.90919	2.66822	4.38485	3.14413	4.38485	3.71896	3.14413	3.04894	3.04894	2.38082	3.6201	3.71896	2.66822	3.04894	3.5249	2.85699	2.19243
1208084	15.51	0.0125	35	6.65268	3.02655	3.16569	3.02655	1.96328	2.26366	2.72705	2.26366	2.48337	1.71684	2.00894	3.07117	3.2505	4.51729	3.01153	3.43367	2.56422	4.51729	4.09612	3.01153	2.56422	4.51729	3.88592	4.93927	3.85664	4.30659	4.06835	2.80088	3.22248	2.14009	3.22248	3.22248	2.59061	3.22248	2.38082
1208085	14.81	0.0069	35	4.39002	1.96328	2.26366	2.42797	2.26366	2.12947	3.62636	3.92655	2.42797	3.16569	2.72705	3.02655	3.02655	2.56422	3.92655	3.79142	3.62636	3.92655	4.09058	4.09058	3.02655	2.72705	3.32634	2.42797	3.62636	3.49259	1.96328	2.72705	2.42797	3.02655	3.02655	2.56422	2.26366	2.71038	1.96328
1208086	16.32	0.0068	35	5.23781	2.57305	2.85699	1.53558	2.09729	2.19243	2.09729	1.90466	3.43367	3.5249	2.66822	2.57305	2.19243	1.90466	2.19243	2.09729	3.14413	2.09729	2.57305	3.6201	2.85699	2.57305	3.33315	3.6201	2.85699	3.04894	4.57217	3.14413	2.09729	1.90466	2.38082	2.19243	1.90466	2.57305	4.28548
1208087	19.02	0.0112	35	6.00043	2.38082	2.66822	2.66822	2.09729	2.38082	3.30583	3.46653	2.84107	3.25747	3.04894	4.39002	4.34329	3.30583	3.67604	3.51202	4.13469	5.01218	3.71896	3.71896	4.046	3.2013	4.47189	3.19421	3.40716	3.62636	3.19421	5.74957	4.68968	4.25894	4.89779	4.47696	4.89779	3.83305	4.68968
1208088	15.81	0.0062	33	6.35283	2.26366	2.72705	3.32634	2.12947	1.66317	4.93927	2.80088	2.38082	2.80088	3.01153	3.43367	2.80088	3.22248	2.80088	2.56422	3.01153	3.01153	2.80088	3.01153	2.14009	3.46653	5.57336	2.38082	3.43367	3.64507	3.46653	3.01153	4.72819	3.64507	3.64507	2.80088	3.22248
1208089	17.17	0.0078	40	4.43114	3.07117	3.07117	2.77649	2.30338	1.53558	1.83184	1.71684	1.49063	2.55537	2.35208	2.34242	3.40716	3.40716	3.62636	4.25894	3.83305	3.4138	3.40716	4.68484	4.26426	3.40716	2.76831	2.98126	2.12947	3.4138	3.19421	4.046	4.47696	2.76831	3.4138	3.6201	3.6201	4.68968	3.22248	2.56422	3.64507	2.59061	2.77649	4.51729
1208090	19.07	0.0136	39	4.49213	3.2013	2.35208	3.2013	2.59061	1.91652	3.85664	2.56422	2.56422	3.64507	3.83896	3.85664	3.83896	3.85664	4.72819	3.64507	3.85664	2.77649	4.28019	3.85664	3.85664	3.22248	3.43367	4.06835	3.85664	3.01153	3.64507	2.98886	3.01153	2.77649	2.59061	2.35208	4.06835	2.35208	2.12947	2.14009	2.34242	2.98886	2.77649
1208091	18.76	0.0118	40	5.15051	3.22248	3.43367	2.80088	1.71684	1.50576	1.50576	1.71684	1.50576	1.92832	2.19243	2.30338	2.12947	2.30338	2.00894	2.30338	1.83184	2.89639	3.2505	2.59935	3.83896	3.07117	3.36699	3.07117	4.49213	3.43367	3.72505	4.67515	4.19998	5.91671	3.43367	2.77649	4.19998	2.95836	2.95836	3.90919	3.2505	3.90919	4.19998	5.44162
1208092	20.1	0.0127	47	4.76164	2.19243	3.14413	1.90466	1.71684	2.19243	1.90466	3.14413	1.42849	1.71684	1.62176	2.19243	1.71684	2.19243	2.85699	2.66822	2.85699	2.38082	2.77649	3.22248	2.35208	3.2013	3.43367	3.2013	3.4138	3.85664	4.28019	3.83896	4.06835	2.98886	3.85664	3.64507	3.2013	3.4138	3.01153	3.83896	2.56422	3.64507	3.4138	3.85664	3.64507	3.62636	2.35208	2.98886	2.35208	3.01153
1208093	14.32	0.0071	35	6.76757	3.51202	3.71896	1.75601	2.42797	2.84107	1.55028	1.75601	3.04894	2.42797	1.29531	3.10056	2.84107	2.84107	3.71896	3.30583	1.50576	1.3468	3.36699	3.63884	3.77343	3.16569	3.63884	2.69359	2.02019	2.49248	2.89639	2.96601	2.22323	2.49248	2.69359	3.56965	3.83896	3.63884	3.36699
1208094	19.4	0.0136	43	7.54687	4.24294	3.30583	3.36699	1.55028	2.22323	2.22323	2.42797	2.22323	2.69359	2.22323	2.02019	2.63401	1.81942	1.96328	2.69359	3.36699	3.10056	3.56965	3.30583	3.36699	3.77343	3.77343	3.97818	3.56965	2.42797	4.04039	4.71379	2.89639	2.69359	2.69359	3.16569	3.36699	2.89639	3.56965	2.69359	4.04039	4.04039	2.22323	2.49248	3.56965	3.56965	3.83896
1208095	23.47	0.0237	41	6.67768	4.29279	2.77304	3.62628	1.62452	2.57744	2.57744	4.76977	2.84592	3.26302	3.31147	3.93325	3.47244	4.39751	3.05414	4.14174	4.39751	3.93325	4.3507	3.51801	3.93325	3.05414	2.63851	4.14174	3.26302	3.05414	3.31147	3.68231	3.31147	4.14174	3.51801	2.59504	3.72531	6.57121	3.47244	3.31147	4.14174	2.80566	3.72531	5.22937	4.3507
1208096	13.41	0.0035	33	6.34218	3.03171	2.715	1.96663	2.26752	1.36585	1.81	1.96663	1.50833	2.5686	1.66601	2.8698	4.07529	2.8698	3.63255	2.41333	3.33202	2.8698	3.47244	4.39751	5.43837	3.93325	2.63851	3.93325	4.81251	3.72531	3.51801	3.05414	3.05414	2.43211	3.51801	4.14174	3.51801
1208097	18.53	0.0136	41	4.68968	1.91652	1.70358	1.50576	1.27768	1.06474	1.70358	1.71684	1.70358	1.27768	2.14009	2.12947	2.56422	2.55537	2.98886	2.34242	1.70358	1.92832	3.40716	2.98886	4.26426	3.6201	4.26426	3.83896	3.19421	3.62636	2.76831	2.56422	5.32794	3.2013	4.47696	2.56422	4.26426	2.98886	3.83896	3.83896	4.26426	3.2013	2.34242	2.98886	3.4138
1208098	13.76	0.0064	34	5.6356	2.96341	2.96341	3.25604	1.81	3.01667	2.8698	2.41333	2.11167	2.715	1.81	2.41333	3.01667	1.96663	2.715	3.92167	3.01667	3.92167	3.77385	3.92167	4.29279	3.05414	3.05414	3.81582	4.10311	3.14949	3.05414	3.05414	4.10311	3.05414	2.96341	2.38488	1.90791	1.5382
1208099	17.26	0.0102	38	7.05217	2.99396	3.41963	1.9198	1.93161	1.49317	2.78123	2.13311	1.71976	1.9198	1.93161	2.55973	4.07529	5.55018	4.69768	4.27154	2.35609	3.41963	3.41963	2.78123	3.20676	3.41963	2.5686	3.41963	2.35609	2.35609	3.63255	4.27154	3.41963	2.5686	2.99396	2.35609	2.5686	2.5686	2.99396	2.13311	2.5686	3.63255
1208100	17.57	0.0092	34	7.17054	2.78123	2.30731	2.19617	2.01237	1.71976	1.5382	2.01237	2.01237	2.48761	2.67277	3.25604	3.07641	3.14949	3.07641	2.43211	5.1372	2.5686	3.01667	3.63255	3.47244	2.8698	4.23409	4.07529	3.17109	1.96663	2.13311	2.26752	2.8698	1.96663	2.5686	1.96663	2.41333	2.26752
1208101	20.16	0.0096	42	5.71397	2.00894	1.42849	1.90466	1.71684	1.42849	1.24168	1.75601	2.38082	3.25747	2.17164	3.25747	3.30583	2.80088	3.04894	3.71896	3.71896	3.88592	3.51202	4.06835	3.76742	3.76742	3.16569	3.46653	3.76742	4.06835	4.06835	3.46653	4.9713	3.46653	4.9713	3.46653	2.48337	2.95836	2.48337	3.2505	2.95836	3.2505	2.77649	3.43367	2.77649	3.2505
1208102	18.47	0.0087	39	4.0529	2.35609	2.98635	2.55973	2.35609	2.55973	2.34642	2.34642	2.14374	2.55973	3.19966	4.05851	4.26621	2.14374	2.98635	2.14374	3.41963	2.99396	4.05851	4.49979	5.79483	4.9477	4.28749	4.9477	2.99396	2.80566	3.65129	5.15929	2.78123	4.07529	3.01667	3.22797	3.43953	3.86322	3.41963	3.43953	4.31394	2.5686	2.14374
1208103	22.27	0.0207	40	4.61461	2.78123	3.19966	2.01237	1.06655	1.83497	1.71976	2.13311	4.14174	3.84551	3.19966	3.37274	1.71976	4.43871	3.37274	3.07641	3.19966	3.5502	3.66993	4.43871	4.9477	4.92466	4.10311	3.86322	4.07529	2.80566	5.58287	4.28749	3.43953	3.01667	3.43953	5.58287	2.99396	3.43953	4.9477	5.15929	5.15929	3.86322	3.65129	3.43953
1208104	18.23	0.0111	46	5.40059	3.01667	3.22797	2.38488	1.71976	1.759	1.71976	1.71976	2.17535	4.56006	3.68231	3.72531	4.10311	4.3507	4.56006	4.76977	4.3507	4.3507	4.10311	4.3507	3.89255	4.07529	4.83609	4.97979	4.53505	3.17109	3.47244	3.17109	4.37677	3.47244	2.8698	2.5686	2.8698	2.11167	1.66601	2.11167	2.26752	2.26752	3.25604	3.43953	3.25604	2.78123	2.19617	2.48761	2.48761	2.01237
1208105	18.28	0.0092	39	4.61461	3.19966	3.5502	2.13311	1.83497	2.78123	2.90134	2.30731	2.30731	2.30731	2.43211	3.07641	3.37274	2.78123	3.66993	3.07641	3.84551	3.44614	5.26838	4.59485	6.21902	4.59485	5.26838	6.02201	4.31921	3.92167	4.39751	3.64505	3.17109	2.57744	3.44614	3.44614	3.64505	2.97107	4.39751	2.97107	2.97107	2.97107	3.05414
1208106	13.24	0.0039	28	7.40467	3.93325	3.17109	3.63255	2.5686	2.26752	3.17109	2.5686	1.66601	2.8698	2.26752	2.8698	2.13311	3.07641	2.90134	2.30731	3.37274	2.78123	3.37274	2.60379	2.78123	2.78123	3.19966	2.13311	2.90134	2.60379	2.13311	2.43211
1208107	18.87	0.0083	38	5.56246	1.9198	2.35609	2.78123	3.41297	2.5686	2.78123	1.49317	1.29752	1.49317	1.50833	1.70648	2.35609	2.78123	4.69768	2.78123	1.83497	2.60379	2.60379	2.90134	3.37274	3.19966	3.37274	3.84551	3.49855	2.30731	2.30731	3.19966	3.37274	4.14174	3.19966	2.90134	2.78123	3.19966	3.37274	3.19966	3.5502	3.19966
1208109	12.62	0.0039	32	5.07033	3.98497	3.31147	2.22703	2.43211	1.55292	1.759	2.02364	1.759	3.51801	1.82253	1.82253	2.43211	3.17109	3.17109	3.44614	3.37274	2.90134	2.49674	4.31921	3.44614	2.43211	2.02364	2.49674	2.22703	1.82253	2.69819	2.22703	1.82253	2.49674	2.69819	3.37274
1208110	20.58	0.0173	49	5.40059	3.43953	1.93161	2.38488	2.14374	2.17535	2.5686	1.96663	1.71976	1.93161	2.17535	2.35609	1.71976	2.38488	2.59504	2.17535	2.35609	2.38488	3.01667	3.05414	3.22797	3.68231	4.10311	4.10311	3.68231	4.31394	1.82253	3.05414	3.44614	2.49674	2.29743	3.53092	3.64505	3.24905	2.97107	3.53092	3.44614	3.24905	1.82253	4.4846	3.33884	4.00774	2.86186	4.00774	2.86186	2.10087
1208111	22.87	0.0187	40	8.63842	4.14174	2.60379	1.5382	1.5382	1.71976	2.30731	1.5382	1.83497	2.78123	2.30731	3.66993	3.07641	3.62628	3.62628	4.57997	3.62628	4.8689	3.91586	4.57997	3.81582	3.19966	2.77304	3.83959	2.98635	2.99396	2.55973	2.98635	3.83959	3.83959	3.19966	4.05851	6.18601	3.84551	3.41297	2.98635	2.78123	2.34642	3.19966	4.27154
1208112	18.32	0.0103	39	5.27701	2.84592	2.69819	2.38488	1.55292	1.34909	1.29752	1.759	1.96663	2.13311	2.43211	2.73171	3.49855	3.19966	3.19966	3.03171	2.43211	4.26621	3.49855	4.86423	3.03171	3.49855	2.90134	4.86423	4.56505	5.1637	5.63156	4.67827	4.37677	5.88443	4.67827	4.37677	4.97979	4.37677	4.97979	3.47244	5.58287	3.77385	3.47244
1208113	19.23	0.0138	42	5.9765	3.07641	2.60379	2.30731	1.83497	2.01237	2.60379	2.60379	2.30731	2.43211	3.84551	3.84551	4.43871	3.84551	5.67983	4.51997	6.68108	3.84551	4.72183	4.45406	4.51997	5.80268	4.72183	3.84551	2.90134	3.37274	4.25018	3.77987	4.31921	3.10585	4.92466	4.04728	3.84551	3.47244	4.14174	3.31147	2.80566	3.05414	3.05414	2.63851	3.05414	2.84592
1208114	20	0.0124	39	5.68214	2.42797	2.84107	1.96328	1.71684	1.75601	2.17164	2.63401	1.96328	2.84107	2.63401	3.25747	2.84107	3.04894	2.84107	3.51202	3.46653	3.30583	2.19243	2.19243	3.6201	2.95836	3.90919	3.43367	2.38082	2.95836	3.43367	2.95836	3.16569	2.76831	3.16569	4.31185	4.51227	4.58702	4.49213	3.83896	4.67515	4.01788	4.31185
1208115	19.87	0.0102	40	4.25018	2.69819	2.49674	1.55292	2.69819	2.29743	2.69819	1.34909	1.82253	2.22703	2.02364	1.82253	2.22703	2.22703	3.44614	3.10585	3.64505	4.25018	3.17109	4.51997	4.31921	4.51997	4.11971	2.90134	4.99347	2.97107	3.84551	3.37274	3.84551	3.17109	4.11971	3.17109	3.84551	4.25018	3.17109	3.17109	3.43953	3.22797	3.22797	3.01667
1208116	20.21	0.0133	48	6.35283	2.42797	2.84107	2.89639	2.17164	2.89639	1.75601	1.75601	1.50576	1.55028	1.3468	1.53558	2.10807	1.36353	1.50576	1.66317	1.50576	1.96328	1.96328	2.26366	2.26366	2.86491	3.16569	3.16569	4.22688	3.76742	3.76742	3.62636	2.56422	3.02655	3.16569	3.62636	3.76742	3.62636	2.72705	3.16569	3.92655	3.46653	2.42797	2.86491	2.26366	2.26366	2.56422	2.56422	3.32634	3.16569
1208117	18.97	0.0101	39	4.99347	3.72531	4.59485	3.64505	2.29743	1.62452	2.02364	2.10087	1.55292	2.29743	2.57744	2.02364	2.57744	2.5686	3.86322	4.31394	3.86322	2.99396	4.525	4.28749	4.49979	4.10311	4.07529	3.65129	3.65129	2.99396	3.20676	4.07529	2.78123	3.65129	2.35609	3.20676	2.35609	3.41963	3.43953	2.86186	3.05414	3.72531	4.00774
1208119	16.32	0.0077	31	5.53786	3.05414	3.72531	3.10585	2.17535	1.759	4.19089	2.63851	1.759	3.98497	3.51801	2.63851	2.63851	2.63851	2.84592	2.80566	2.63851	3.47244	4.56006	3.72531	3.47244	5.22937	4.76977	3.93325	4.56006	3.91586	4.61461	4.31921	4.02474	3.25604	2.78123
1208120	17.48	0.0092	35	6.47654	2.56422	2.59061	3.01153	2.38082	1.92832	2.38082	2.38082	2.80088	3.01153	3.36699	2.89639	3.66368	5.02573	4.13469	3.49259	3.07117	2.72705	3.07117	2.72705	2.30338	3.36699	3.19421	3.66368	3.49259	3.66368	3.96105	5.49552	3.66368	3.66368	2.89639	4.72819	3.07117	2.89639	3.19421
1208121	18.58	0.0092	45	6.35283	2.38082	2.63401	2.63401	1.96328	2.59061	2.42797	2.17164	1.3468	1.29531	1.55028	1.29531	1.50576	1.75601	1.75601	1.96328	2.17164	1.75601	2.22323	2.59061	2.48337	2.19243	2.66822	2.77649	2.48337	3.6201	2.48337	3.2505	3.90919	2.77649	3.90919	4.67515	3.72505	2.95836	2.19243	3.25747	3.04894	2.63401	3.25747	2.17164	3.51202	3.92655	3.46653	3.71896	5.01218
1208122	14.77	0.0072	40	8.20899	3.44614	2.38488	2.77304	2.57744	1.90791	1.82253	1.43093	3.05414	2.57744	2.29743	2.38488	2.57744	2.10087	2.10087	2.10087	1.90791	2.29743	2.10087	3.17109	2.84592	2.49674	2.90134	2.90134	2.90134	3.51801	3.57574	2.22703	2.49674	3.24905	2.77304	2.38488	2.77304	2.10087	2.29743	2.57744	3.53092	2.77304	2.38488	3.53092
1208123	20.13	0.0121	38	6.18601	2.715	3.77385	2.715	2.715	1.96663	1.81	1.81	1.43093	1.90791	2.19617	2.01237	3.14949	2.67277	2.96341	2.67277	3.14949	4.10311	2.96341	3.72531	3.17109	3.05414	3.24905	2.77304	3.44614	3.53092	3.17109	3.24905	3.24905	3.24905	3.24905	3.44614	3.24905	3.24905	3.05414	2.84592	3.77987	4.65877
1208124	22.48	0.0219	44	6.83926	2.99396	2.34642	2.5686	2.99396	2.78123	1.9198	1.93161	1.9198	2.14374	1.49317	2.35609	2.78123	2.5686	2.98635	3.20676	2.14374	4.61461	4.43871	3.5502	4.14174	5.38372	2.60379	3.07641	2.60379	3.07641	3.84551	3.37274	2.78123	2.90134	2.78123	4.14174	3.84551	3.37274	3.5502	2.90134	2.78123	2.96341	5.15929	5.15929	3.43953	4.68313	4.8689	2.96341
1208125	20.56	0.0121	41	4.96148	2.38488	3.62628	3.53092	2.38488	1.90791	1.62452	2.19617	2.38488	4.20173	2.86186	3.33884	3.62628	3.72531	4.29279	4.29279	4.29279	5.89988	3.98497	2.59504	2.84592	2.84592	2.84592	3.51801	3.31147	2.63851	3.26302	3.31147	4.14174	2.63851	1.759	2.63851	4.29279	3.14949	3.81582	2.86186	2.10087	3.05414	3.14949	3.81582	3.53092
1208126	13.97	0.0054	32	4.67515	2.48337	2.00894	1.42849	1.53558	1.71684	2.30338	2.19243	2.48337	1.24168	1.24168	1.53558	1.42849	2.48337	2.30338	1.80692	2.71038	2.86491	3.61383	3.01153	3.16569	3.31268	2.40922	2.56422	3.01153	2.10807	2.71038	2.56422	2.40922	2.71038	3.31268	3.46653
1208127	23.12	0.0243	45	6.19014	2.72705	3.02655	3.16569	3.62636	2.42797	2.56422	3.02655	2.56422	4.39002	1.96328	2.86491	2.42797	3.62636	4.22688	3.62636	4.36931	4.52732	4.36931	5.42911	3.92655	4.36931	5.12845	4.52732	5.27232	3.62636	3.76742	2.86491	3.16569	2.26366	3.16569	3.46653	2.56422	3.16569	2.86491	2.56422	2.86491	3.76742	3.92655	3.16569	2.56422	2.86491	3.16569	3.46653	3.46653
1208128	20.1	0.0145	44	5.96252	2.12947	2.35208	1.91652	1.49063	2.12947	1.27768	2.00894	2.42797	1.53558	2.12947	1.83184	2.12947	1.83184	2.59935	2.42797	3.49259	2.89639	3.19421	3.07117	3.96105	3.19421	3.19421	2.59935	3.19421	3.66368	3.79142	3.96105	3.36699	2.42797	2.42797	2.89639	3.36699	3.36699	2.89639	2.42797	2.59935	3.36699	3.66368	3.49259	2.59935	3.96105	3.36699	3.96105
1208129	19.71	0.015	46	5.1461	1.42849	1.62176	1.62176	1.14676	1.42849	1.3468	1.71684	1.62176	1.81942	2.57305	1.90466	3.04894	3.22248	2.80088	4.55229	3.46653	3.64507	3.88592	4.55229	4.9713	4.72819	4.55229	5.18123	3.64507	3.67604	3.46653	3.67604	4.72819	3.67604	3.88592	4.09612	2.38082	3.67604	4.09612	3.67604	3.43367	2.80088	3.25747	3.04894	3.71896	3.46653	4.80431	3.71896	3.51202	3.46653
1208130	21.18	0.0186	44	4.72819	3.07117	3.36699	3.36699	4.72819	3.07117	4.13469	3.96105	3.96105	2.89639	2.89639	3.36699	2.42797	5.79279	2.30338	3.19421	2.89639	3.07117	3.66368	3.83896	3.36699	2.30338	3.83896	4.13469	4.86527	5.53663	3.71896	5.53663	4.86527	5.0617	3.24351	4.86527	4.39002	3.44027	4.86527	3.24351	2.76831	4.47696	3.71896	3.04894	3.04894	2.57305	3.5249	4.6703
1208131	12.82	0.0041	32	5.25952	2.22323	2.49248	2.29351	2.02019	2.09729	1.70358	2.14009	1.91652	1.92832	2.12947	2.35208	3.2013	2.55537	3.4138	3.62636	2.98126	3.2013	3.4138	3.4138	4.25894	2.89639	3.32634	2.72705	2.42797	2.12947	1.83184	2.86491	2.40922	1.96328	2.56422	2.86491
1208132	12.28	0.0041	34	6.4026	2.55537	1.71684	1.70358	2.14009	1.70358	1.71684	1.90466	2.09729	2.57305	2.29351	2.02019	1.75601	2.29351	1.75601	2.49248	2.42797	2.49248	2.89639	2.22323	2.42797	2.02019	2.49248	2.22323	2.42797	2.02019	2.49248	1.75601	2.29351	2.89639	2.22323	2.42797	2.29351	1.55028
1208133	22.27	0.0203	37	5.85731	2.67277	2.78123	2.78123	2.30731	2.96341	3.5502	2.19617	2.78123	3.25604	4.43871	4.43871	3.84551	4.26621	4.14174	5.03431	3.37274	3.66993	3.07641	3.49855	5.7396	4.37677	3.77385	4.37677	3.47244	3.93325	3.47244	4.07529	4.37677	4.07529	5.1372	3.47244	5.7396	4.67827	4.86423	4.56505	3.49855
1208134	20.76	0.0154	41	6.41382	3.63248	2.57299	2.77778	2.99145	6.62738	2.77778	2.57299	3.4188	3.63876	3.84615	3.63876	4.70085	2.99145	3.42547	2.5641	2.5641	3.42547	4.11012	4.49226	6.2113	4.01459	4.30013	5.44767	4.77792	7.16688	9.74743	5.25572	4.49226	3.82234	5.64119	5.94079	4.2735	5.34188	4.74436	2.43627	3.20513	2.31125	2.73638	3.67621	3.0369
1208135	23.24	0.0214	42	6.11873	3.05936	2.10446	2.38896	2.77778	1.91117	2.38896	1.3514	2.19992	2.10446	2.5641	2.77778	3.20513	4.2735	4.05983	4.91453	4.48718	5.34188	4.70085	5.12821	6.41382	4.91453	5.76923	5.55556	7.69231	4.70085	3.63248	3.63248	3.4188	5.13265	5.55966	4.91917	5.57197	3.4188	4.27884	5.35895	6.41382	4.27884	4.91917	4.27884	3.85208	3.4188
1208136	19.31	0.0131	44	5.49552	2.30338	2.12947	2.12947	2.30338	1.83184	1.83184	1.66317	2.00894	2.12947	2.42797	2.59935	2.30338	2.42797	2.59935	2.89639	3.07117	3.49259	2.89639	1.83184	1.83184	2.56422	2.56422	1.96328	2.56422	2.86491	2.86491	3.02655	3.46653	3.32634	3.92655	2.86491	3.16569	3.92655	3.62636	3.16569	3.62636	4.22688	3.76742	4.82785	4.22688	4.52732	4.82785	3.92655
1208137	12.04	0.0025	30	4.57285	2.73638	2.13675	2.13675	2.43627	2.9063	2.43627	2.13675	1.36819	1.8381	1.36819	1.8381	2.2714	2.13675	1.8381	2.43627	1.8381	2.13675	2.73638	1.8381	1.96999	2.43627	3.67621	2.43627	2.13675	2.73638	2.9063	3.50453	2.43627	3.20513
1208138	20.24	0.0157	49	5.11517	2.55537	2.77649	2.34242	2.77649	1.91652	2.56422	1.49063	1.92832	2.34242	1.91652	2.56422	2.76831	1.71684	2.55537	2.56422	2.76831	2.77649	2.55537	2.77649	3.33315	3.2505	4.09612	3.90919	3.14413	4.19998	4.86061	4.86061	4.96674	5.04824	5.626	4.67515	5.15051	3.90919	3.14413	3.72505	3.54415	3.54415	4.01788	3.72505	3.83896	2.95836	3.07117	3.54415	2.95836	4.31185
1208139	20.72	0.0159	43	7.05452	2.60824	2.9063	4.14882	2.31125	2.13675	2.9063	2.60824	2.31125	3.20513	2.01581	2.13675	3.17651	2.9063	2.97615	4.25745	3.85208	3.78633	4.25745	3.65128	5.4056	4.25745	4.5277	4.7299	4.0542	3.11116	3.3785	3.11116	2.7028	3.78633	4.46167	3.58185	3.58185	4.7299	3.3785	2.43627	3.11116	3.85208	3.78633	3.78633	4.46167	4.25745	4.25745
1208140	18.66	0.0121	43	4.49226	3.92837	3.73168	2.58185	2.86675	1.82564	2.38896	1.82564	1.91117	2.77778	1.91117	3.73168	2.10446	2.10446	2.77778	2.19992	2.30135	2.30135	4.01459	2.67734	4.03162	3.44541	3.44541	3.92256	3.55626	3.44541	2.78598	2.96847	3.15488	4.21433	3.55626	2.67734	3.26161	2.67734	2.2714	3.17651	2.87471	2.87471	3.17651	3.0369	4.84435	4.38425	2.87471
1208141	19.34	0.0084	27	4.74436	2.9063	2.60824	2.9063	2.9063	2.60824	4.14882	4.40503	3.93998	3.93998	3.63876	5.60872	5.00657	4.24133	5.00657	4.70571	5.90996	5.60872	4.10457	2.87471	2.73638	3.63876	3.63876	2.57299	3.63876	3.0369	3.33771
1208142	22.43	0.0238	50	5.40059	3.01667	2.17535	2.14374	2.80566	1.96663	2.5686	2.38488	3.89255	4.10311	2.59504	2.38488	2.5686	2.17535	1.93161	2.59504	3.89255	4.73626	3.05414	3.22797	2.80566	3.22797	3.68231	3.89255	4.73626	3.89255	3.89255	3.65129	5.85731	4.31394	3.01667	2.80566	3.43953	4.76977	4.525	4.97979	5.03431	4.69768	4.56505	4.56505	3.79789	4.39751	4.86423	5.76333	3.79789	5.33276
1208143	20.87	0.0119	34	6.04365	3.05936	2.14741	3.47838	3.02182	2.81046	3.23349	2.17907	3.44541	3.02182	4.11012	4.32131	3.2686	3.86982	4.56785	3.89921	3.02182	3.02182	3.45203	5.35895	5.83611	3.2546	4.20891	3.2546	3.73168	2.97615	3.53695	5.35895	2.77778	2.77778	3.92837	3.53695	2.97615	3.73168
1208144	16.39	0.0067	29	6.11873	3.53695	2.77778	4.01459	2.30135	1.43338	1.15068	2.19992	2.77778	1.91117	4.40503	3.53695	3.73168	2.58185	4.68626	2.58185	3.82234	3.05936	4.11012	3.63248	4.21433	4.69113	4.11012	4.87723	3.34455	3.26161	4.11012	3.15488	4.21433
1208145	11.08	0.0024	29	5.46342	1.96663	1.96663	2.13311	2.26752	2.26752	2.13311	2.73171	1.96663	1.66601	1.36585	2.26752	3.03171	2.13311	2.73171	2.8698	4.09756	2.73171	2.5686	2.13311	2.73171	3.19966	2.43211	2.60379	1.96663	1.5382	1.36585	1.83497	1.83497
1208146	15.69	0.0052	30	5.39292	2.78598	2.31125	2.60824	3.26161	5.98672	1.6273	1.91117	2.01581	2.10446	2.67734	2.49186	4.11012	2.86675	2.67734	2.38896	2.38896	2.49186	2.38896	3.15488	2.78598	2.36012	1.92308	2.36012	2.36012	1.92308	2.99907	3.65753	2.99907	2.5641
1208147	21.52	0.019	50	4.46167	2.23083	2.23083	2.43627	2.43627	1.76201	1.3514	2.43627	2.0271	1.08953	1.82564	2.23083	1.96999	2.17907	2.23083	2.85078	2.59947	2.43627	1.96999	2.85078	2.17907	2.64302	4.35814	3.31713	3.73168	3.2686	4.82073	4.14882	4.19805	3.47838	3.31713	3.2686	4.14882	4.14882	5.44767	4.35814	4.77792	3.2686	4.35814	3.93998	2.81046	3.47838	5.02932	3.47838	3.05936	3.89921
1208148	18.83	0.0126	36	5.16811	2.36012	2.81046	2.36012	3.21224	3.89921	3.86982	3.42547	2.59947	3.86982	4.08226	2.38896	3.02182	3.44541	4.08226	3.02182	4.95616	3.89921	5.3802	4.11012	4.08226	3.89921	3.86982	4.74436	4.11012	3.44541	3.42547	4.50748	4.08226	4.72024	3.21224	2.36012	3.21224	3.86982	4.93308	3.86982
1208149	12.84	0.0041	24	4.5428	5.59242	3.47838	1.96999	4.08226	2.57299	5.14598	3.7803	4.24133	3.17651	1.81309	2.2714	2.9063	2.13675	2.13675	2.60824	2.9063	3.20513	3.3785	3.67621	3.97459	3.67621	3.97459	5.04292
1208150	23.29	0.0243	48	4.71218	2.38488	2.78123	1.71976	1.27986	1.08767	1.50833	1.93161	1.27986	1.50833	1.71976	2.35609	3.22797	2.5686	2.59504	2.35609	2.14374	3.43953	2.35609	2.57744	2.77304	2.77304	3.72531	3.05414	4.87357	5.3498	5.54608	3.72531	5.3498	5.3498	5.3498	3.24905	5.82615	4.87357	5.07033	3.72531	4.67827	3.44614	3.72531	5.82615	5.82615	3.44614	4.28749	3.63255	4.92466	4.91078
1229113	24.42	0.0325	48	5.63156	3.03171	2.90134	1.96663	1.66601	1.5382	1.96663	2.43211	3.19966	2.86186	2.67277	2.57744	2.86186	3.05414	3.33884	4.4846	3.62628	3.72531	3.62628	2.38488	2.57744	3.05414	5.05686	5.63156	4.29279	4.00774	6.2007	4.96148	5.53376	5.15488	6.3026	5.07033	3.72531	4.67827	3.72531	3.53092	3.72531	4.67827	4.39751	4.96148	4.39751	5.15488	5.15488	3.44614	6.10829	4.67827
1229114	29.27	0.0521	44	5.93966	2.89639	2.17164	1.14676	1.29531	1.81942	2.17164	2.42797	2.22323	2.63401	2.89639	2.84107	2.89639	3.97818	3.51202	3.51202	2.63401	5.1196	4.5969	2.63401	8.54181	6.6322	3.85664	3.2013	4.49213	3.83896	4.70416	5.36187	9.62041	2.80088	3.22248	3.43367	4.09612	3.88592	5.15051	7.95066	6.26658	5.78496	5.81233	7.52882	8.40265	7.95066	7.77184	7.29014
1229115	17.5	0.022	37	5.43837	1.96663	2.73171	2.8698	1.81	1.66601	2.5686	2.26752	3.03171	2.26752	2.8698	3.37274	3.19966	3.5502	3.37274	3.66993	3.07641	3.07641	3.66993	3.66993	3.5502	2.90134	3.37274	4.53505	4.07529	2.5686	2.8698	3.33202	3.47244	2.67277	2.96341	2.48761	2.67277	3.43953	3.73141	2.96341	2.19617
1229116	22.96	0.0366	50	4.39751	3.26302	3.51801	2.22703	2.17535	1.55292	1.759	2.63851	4.14174	2.22703	1.759	2.38488	1.96663	1.55292	2.22703	2.17535	1.96663	2.22703	3.05414	4.19089	3.93325	4.39751	3.31147	4.39751	3.41297	3.84551	3.62628	6.18968	3.83959	3.62628	2.99396	5.33276	4.69768	3.19966	4.27154	4.0529	4.45406	4.45406	4.04728	4.04728	3.57574	4.20714	2.67277	3.07641	2.78123	2.67277
1229117	18.82	0.0121	34	6.30975	2.96847	3.63248	2.19992	2.67734	2.86675	2.67734	3.92256	1.7227	3.34455	3.63248	2.49186	3.92256	3.63248	3.82234	2.67734	3.63248	4.69113	3.82234	3.92256	2.67734	4.87723	3.44541	3.15488	3.34455	2.49186	5.54321	3.15488	3.44541	2.86675	3.73779	5.54321	4.39984	7.07713
1229118	21.52	0.0168	44	4.49979	2.5686	2.59504	1.70648	1.50833	1.50833	2.38488	1.71976	1.90791	2.26752	3.03171	2.11167	1.66601	3.03171	3.31833	3.47244	3.01667	3.47244	2.41333	3.31833	4.37677	2.41333	2.41333	4.37677	4.82667	6.48759	4.37677	4.82667	2.715	3.17109	3.92167	2.8698	3.01667	1.96663	2.43211	3.79789	4.09756	3.33202	3.19966	2.73171	3.33202	2.43211	2.73171	3.03171
1229119	20.47	0.0155	42	5.09695	2.31125	2.31125	2.49186	2.31125	1.81309	2.41746	3.62619	2.71964	2.71964	2.41746	3.32401	2.71964	3.62619	3.17651	3.32401	3.92837	3.32401	5.43928	5.1371	3.92837	3.3785	3.85208	3.67621	3.85208	3.3785	2.31125	3.26161	4.44629	2.31125	2.60824	3.3785	3.3785	3.55626	4.14882	3.3785	4.32659	3.08167	2.13675	3.3785	2.78598	2.60824
1229121	29.57	0.0738	64	4.59485	2.77304	3.64505	2.69819	2.29743	1.82253	2.10087	2.02364	2.29743	2.49674	3.44614	2.02364	2.10087	2.29743	2.02364	1.62452	4.79356	2.29743	2.02364	2.10087	1.82253	2.69819	2.57744	2.97107	3.17109	2.29743	3.17109	3.44614	4.25018	3.92167	4.99347	4.25018	4.79356	3.37274	4.79356	4.31921	4.79356	5.39638	4.79356	3.64505	5.6678	5.46758	6.34218	3.72531	4.4846	4.67827
1229122	24.9	0.0258	42	7.26496	3.15488	3.44541	2.67734	2.67734	2.10446	2.19992	2.01581	2.38896	3.44541	3.15488	2.86675	3.15488	4.24133	3.47838	3.47838	3.93998	3.7803	4.9883	5.74941	4.5428	5.59242	5.44767	5.34188	3.33771	7.44191	8.81005	4.40503	4.10457	4.40503	5.00657	3.0369	6.07379	3.80438	3.93998	3.73779	2.9063	3.55626	4.32659	5.39292	4.32659	4.6225
1229123	28.68	0.0418	47	6.66745	3.20676	3.65129	3.43953	2.5686	2.35609	2.14374	1.50833	2.35609	4.28749	3.86322	4.04728	4.19089	4.72183	4.04728	5.53786	4.72183	4.25018	4.65877	3.77987	5.19445	3.98497	5.12833	3.57574	4.72183	3.10585	5.12833	4.04728	4.19089	3.37274	6.62294	6.68108	6.00688	5.74356	5.80268	6.10829	5.82615	6.10829	4.96148	5.63156	6.3922	5.91528	4.10311	5.63156	7.823	7.53865
1229124	26.18	0.0297	52	6.93306	3.32634	3.46653	3.46653	1.66317	2.10807	1.96328	2.56422	1.50576	2.56422	2.86491	2.56422	3.16569	1.66317	2.26366	2.56422	2.10807	2.86491	2.86491	3.92655	3.56965	3.36699	3.16569	4.44647	4.24294	3.63884	3.77343	2.69359	3.63884	3.56965	3.56965	2.49248	3.36699	3.56965	2.69359	3.16569	2.22323	2.42797	2.96601	2.22323	2.02019	1.55028	2.56422	2.38082	2.77649	7.71328
1229125	24.76	0.0264	50	6.48759	2.59504	2.59504	1.71976	1.55292	1.71976	1.96663	2.14374	2.17535	2.38488	2.59504	1.71976	1.96663	2.17535	3.43953	1.759	2.38488	2.38488	3.43953	2.38488	2.80566	2.84592	2.5686	3.43953	3.86322	2.99396	4.31394	4.07529	4.49979	4.28749	3.20676	5.15929	3.86322	4.28749	4.525	4.14174	5.61133	6.27728	3.81582	4.57997	4.8689	3.14949	6.29899	5.05686	5.24675	4.39233
1229126	17.3	0.007	39	3.72531	2.77304	2.29743	2.29743	2.29743	2.29743	2.02364	2.29743	2.77304	2.77304	2.29743	3.72531	2.49674	3.64505	3.24905	2.29743	2.29743	2.35609	2.77304	3.20676	3.20676	2.5686	3.41297	3.84551	3.20676	3.41963	3.47244	3.01667	2.17535	2.80566	2.38488	1.93161	2.84592	1.93161	1.96663	2.35609	3.05414	2.17535	2.59504
1229127	23.82	0.0252	48	5.62197	3.19421	3.19421	2.12947	4.55727	2.72705	1.83184	1.66317	2.42797	1.53558	1.96328	3.66368	2.72705	2.42797	3.96105	4.09058	3.96105	2.72705	2.72705	2.12947	3.49259	2.89639	3.2505	3.2505	5.55298	3.2505	6.02682	3.72505	4.78539	6.02682	4.49213	3.72505	3.54415	4.01788	3.2505	2.48337	2.48337	4.31185	4.49213	3.72505	5.55298	2.95836	4.01788	5.55298	4.19998	4.01788
1229128	20.5	0.0146	38	9.91749	3.30583	1.96328	2.89639	3.25747	3.30583	3.77343	2.22323	2.84107	3.10056	2.42797	1.96328	4.18375	2.02019	3.71896	3.97818	3.30583	3.97818	3.51202	5.73378	2.84107	3.51202	3.10056	3.51202	4.44647	3.62636	2.56422	3.2013	2.77649	3.2013	2.76831	2.56422	2.98886	3.2013	3.62636	2.77649	3.83896	4.90241
1229129	21.24	0.0174	53	4.19805	2.64302	1.96999	1.3514	1.29974	1.3514	1.08953	2.23083	1.76201	1.29974	2.7028	2.0271	2.0271	1.6273	1.82564	1.55558	1.82564	1.82564	1.76201	1.15068	1.82564	2.0271	2.0271	2.30135	2.23083	2.30135	2.7028	2.97615	3.58185	3.17651	3.17651	2.96847	4.03162	3.73779	3.26161	2.31125	2.78598	2.49186	3.85208	4.21433	3.26161	4.32659	2.78598	3.55626	3.44541	4.32659
1229130	20.26	0.0131	42	4.97979	2.41333	1.20667	1.81	1.50833	1.36585	1.81	1.81	4.65877	3.10585	3.10585	2.63851	1.82253	1.96663	2.43211	1.55292	1.34909	3.31147	2.90134	2.43211	3.19966	3.63255	4.0529	3.20676	4.0529	2.78123	2.77304	3.86322	3.86322	3.43953	4.07529	3.68231	3.65129	3.65129	3.20676	4.10311	3.86322	3.91586	4.39233	3.25604	3.25604	3.73141
1229131	23.62	0.0224	49	7.11574	3.17651	2.2714	1.96999	2.2714	1.66886	1.36819	2.41746	2.2714	2.2714	2.2714	1.96999	2.2714	2.57299	2.73638	3.17651	3.08167	3.67621	3.80438	3.20513	2.31125	2.73638	3.3785	2.73638	2.60824	3.20513	4.44629	2.73638	3.20513	3.3785	3.20513	2.60824	3.80438	3.20513	3.67621	3.97459	3.67621	2.13675	3.20513	2.73638	2.9063	2.13675	3.08167	2.43627	2.43627	2.9063
1229132	18.74	0.0101	32	6.2113	2.87471	5.00657	1.96999	1.81309	3.33771	2.57299	2.57299	1.96999	2.2714	2.2714	1.66886	2.2714	3.0369	2.57299	4.5428	1.96999	2.57299	3.33771	3.47838	3.0369	2.57299	4.08226	4.08226	3.47838	3.47838	3.47838	3.47838	2.57299	2.87471	3.7803	4.38425
1229133	23.38	0.0259	47	5.80268	1.83497	4.26621	1.96663	1.5382	1.96663	1.5382	2.73171	2.30731	2.73171	3.19966	2.43211	3.07641	3.33202	2.99396	3.22797	2.99396	3.65129	4.71218	4.28749	3.41963	4.28749	5.1372	3.86322	4.92466	5.15929	4.28749	3.86322	4.9477	3.41963	4.9477	3.86322	3.86322	4.71218	4.28749	3.22797	2.90134	3.31147	3.57574	3.72531	4.65877	3.57574	4.19089	3.37274	4.39751	5.33276
1229134	19.19	0.0123	40	5.33276	3.66993	1.83497	1.83497	1.06655	1.83497	3.19966	1.5382	2.90134	3.66993	2.60379	2.13311	1.83497	3.66993	3.19966	3.66993	2.90134	4.73626	3.03171	3.47244	3.63255	3.77385	4.23409	4.23409	2.5686	4.23409	2.8698	3.33202	5.1372	4.53505	2.5686	2.26752	2.73171	3.77385	2.43211	2.26752	3.17109	3.63255	3.17109	3.63255
1229135	20.54	0.0148	45	5.19007	3.05414	2.59504	1.96663	2.80566	1.96663	2.14374	2.17535	4.97979	2.38488	2.63851	2.80566	1.71976	2.38488	2.84592	3.22797	2.63851	3.68231	3.47244	3.89255	4.10311	4.3507	5.43837	3.68231	4.53505	6.04087	3.93325	3.77385	3.17109	3.93325	5.1372	4.23409	4.67827	4.53505	3.93325	4.07529	4.83609	3.47244	2.73171	4.07529	3.17109	2.8698	4.23409	2.5686	2.8698
1229136	14.83	0.0046	26	6.73398	2.77649	3.19421	2.30338	1.53558	2.42797	2.00894	2.42797	3.66368	2.59935	2.59935	4.72819	3.54415	3.66368	4.25894	3.83896	2.89639	3.96105	3.36699	3.19421	4.25894	3.66368	6.56002	5.79279	4.13469	6.26296
1229137	20.09	0.0149	46	6.5885	2.01237	2.19617	1.43093	1.5382	1.71976	1.43093	2.01237	2.01237	1.90791	2.01237	2.48761	2.19617	1.90791	2.19617	2.30731	1.90791	2.78123	2.96341	3.62628	3.91586	3.43953	3.41963	2.78123	2.99396	3.19966	3.84551	4.71218	5.1239	3.41963	3.41963	4.4846	3.63255	2.78123	3.41963	3.33884	3.53092	4.00774	3.14949	3.05414	3.33884	3.33884	3.05414	3.81582	2.57744	3.14949
1229138	20.13	0.0183	43	6.22998	2.73171	2.73171	1.96663	1.83497	2.5686	2.73171	2.43211	3.03171	2.13311	3.49855	1.96663	2.43211	3.03171	3.03171	2.73171	2.73171	3.49855	3.19966	3.93325	2.73171	2.73171	3.19966	4.69768	3.79789	4.56505	4.525	2.8698	2.41333	2.715	4.22333	2.8698	3.62	3.31833	4.67827	3.62	3.31833	2.41333	2.26752	2.715	4.82667	3.31833	3.47244
1229139	22.81	0.0279	45	7.62458	3.36699	2.30338	2.59935	3.19421	2.59935	2.30338	2.59935	2.59935	2.89639	2.89639	2.30338	3.49259	5.49552	3.83896	3.66368	3.19421	4.43114	4.43114	4.13469	3.96105	4.90241	3.66368	4.72819	4.43114	4.85594	4.68968	3.49259	3.79142	3.02655	5.45411	3.49259	4.09058	2.42797	1.96328	2.42797	2.42797	4.09058	3.49259	2.42797	2.72705	1.96328	3.19421	2.26366	2.89639
1229140	19.72	0.0128	37	4.76164	4.76164	2.85699	1.42849	1.90466	1.90466	0.952329	2.85699	2.85699	2.85699	2.19243	2.38082	1.90466	0.952329	2.38082	2.85699	1.90466	1.90466	2.85699	2.38082	2.38082	3.80932	1.53558	2.19243	2.00894	4.67515	2.95836	2.95836	4.19998	2.77649	2.95836	2.66822	4.49213	3.72505	3.43367	5.44162	3.2505
1229141	14.99	0.0043	26	5.79279	2.42797	2.59935	2.12947	1.96328	1.06474	1.83184	2.59935	2.42797	1.96328	1.83184	3.02655	2.72705	3.49259	2.72705	3.49259	1.96328	3.19421	2.95836	4.19998	3.43367	3.43367	5.33644	5.91671	4.67515	5.626
1229142	23.72	0.0222	46	5.26802	2.89639	3.30583	1.96328	2.17164	1.55028	1.75601	1.75601	2.02019	1.29531	2.22323	2.17164	5.0617	2.63401	2.02019	2.63401	2.63401	3.71896	3.51202	4.65084	4.18375	5.01218	5.0617	3.97818	4.39002	3.97818	5.47486	5.26802	5.26802	5.93966	5.0617	5.93966	5.26802	5.0617	5.73378	3.71896	4.85594	5.26802	3.97818	4.70416	4.90241	4.28019	7.48048	6.61509	7.69267	8.96657
1229143	14.53	0.008	37	5.34615	2.13675	1.7094	2.13675	2.36012	3.4188	1.92308	2.99907	1.92308	1.7094	2.57299	2.77778	2.5641	3.42547	2.5641	2.13675	2.99907	3.4188	2.35043	2.57299	1.49573	2.35043	1.92308	2.78598	3.4188	3.63876	3.84615	3.63876	2.99145	3.20513	2.78598	2.35043	3.63248	3.42547	4.05983	4.27884	5.13265
1229144	24.88	0.0329	52	4.31921	2.90134	2.60379	2.30731	1.83497	2.60379	2.30731	2.13311	1.83497	2.30731	2.30731	2.30731	1.83497	2.78123	4.02474	4.31921	2.60379	4.79356	4.61461	4.02474	2.30731	4.31921	5.08825	4.79356	3.07641	5.85731	5.56246	5.85731	5.08825	4.02474	4.61461	4.79356	5.08825	3.51801	5.27701	5.07033	4.60474	4.19089	5.27701	4.14174	4.39751	4.19089	4.19089	3.51801	5.02073	4.39751
1229145	20.88	0.0171	37	8.01598	2.26366	1.66317	1.36353	1.06474	2.26366	1.96328	1.96328	1.36353	1.96328	1.66317	1.36353	2.42797	2.56422	1.96328	3.02655	2.72705	3.32634	4.68968	3.62636	4.25894	3.96105	3.66368	5.02573	2.89639	3.66368	5.32368	4.72819	4.43114	4.25894	7.62458	5.32368	3.66368	3.66368	4.25894	4.72819	5.79279
1229146	18.13	0.0101	38	6.12246	2.86675	2.96847	2.49186	2.96847	2.19992	1.15068	2.01581	2.19992	1.24593	1.7227	1.43338	2.49186	1.7227	1.7227	2.86675	2.19992	3.26161	3.44541	1.7227	2.86675	3.92256	3.92256	3.73779	4.01459	4.49226	4.01459	2.30135	3.82234	3.92837	2.19992	3.53695	5.57197	5.57197	5.14598	4.93308	4.72024	4.50748
1229147	18.88	0.0109	31	5.51431	3.97459	2.9063	4.14882	2.43627	1.8381	2.31125	2.43627	2.60824	2.60824	2.13675	4.14882	2.13675	3.3785	4.2735	3.67621	3.67621	4.44629	3.67621	3.20513	3.3785	2.9063	4.74436	2.9063	3.67621	4.14882	3.67621	4.74436	4.2735	4.14882	4.2735
1229148	20.92	0.0196	41	6.47654	2.38082	1.71684	2.38082	1.42849	1.71684	1.62176	3.14413	3.33315	4.09612	2.19243	2.85699	2.85699	4.28548	3.43367	3.33315	3.80932	3.80932	3.43367	4.76164	3.33315	6.28826	3.5249	4.09612	6.00043	4.09612	3.33315	3.91499	4.51729	4.06835	3.91499	3.01153	3.31268	4.21614	5.1196	4.6703	2.10807	3.01153	9.33574	6.17547	6.32421
1229149	21.6	0.0188	43	3.93325	2.8698	2.11167	1.66601	1.20667	1.96663	1.96663	1.81	2.5686	1.96663	2.8698	3.17109	3.17109	2.49674	2.49674	3.84551	2.77304	3.64505	4.99347	4.25018	3.44614	4.31921	5.19445	3.84551	3.92167	4.31921	3.84551	4.72183	3.92167	4.51997	3.37274	3.44614	5.39638	5.26838	4.99347	5.19445	4.59485	4.09756	3.49855	3.03171	3.93325	3.79789	3.49855
1229150	20.73	0.0151	43	3.63876	2.13675	2.77778	2.14741	1.49573	1.49573	1.28205	1.49573	1.7227	1.7094	1.7094	1.7094	1.93491	2.35043	1.92308	2.13675	2.99907	2.35043	3.21224	3.4188	3.63876	2.77778	2.99145	3.85208	2.99145	3.42547	4.20891	3.82234	4.96996	4.68626	4.01459	4.49226	3.92837	3.34455	3.53695	3.73168	4.01459	3.05936	3.34455	3.2546	4.30013	4.49226	5.83611
1229151	27.7	0.0152	57	8.16453	3.07641	1.83497	2.01237	1.5382	1.5382	2.30731	2.30731	1.83497	2.01237	1.5382	2.30731	3.84551	2.30731	3.84551	3.07641	3.37274	3.5502	3.84551	3.84551	5.67983	3.5502	3.07641	2.78123	1.83497	2.78123	2.60379	3.84551	3.5502	3.37274	3.84551	3.84551	3.07641	3.84551	5.38372	3.84551	4.61461	4.61461	5.08825	5.38372	4.22333	5.73167	4.22333	3.77385	4.22333	3.31833
1229152	20.59	0.0152	46	5.65815	2.49248	2.49248	2.09729	2.29351	1.3468	2.69359	2.09729	1.81942	1.62176	1.81942	2.96601	2.89639	3.44027	2.76831	3.36699	3.91499	3.44027	3.83896	3.16569	2.29351	2.96601	2.76831	2.89639	2.57305	3.88592	2.38082	3.88592	4.51729	2.80088	3.25747	3.01153	3.67604	3.22248	3.01153	2.38082	3.01153	2.59061	2.17164	2.59061	2.38082	2.80088	3.01153	2.59061	3.22248	3.67604
1229153	21.9	0.0231	45	5.9765	4.26621	3.66993	2.60379	2.73171	3.37274	2.43211	2.60379	3.37274	2.43211	3.37274	3.96781	3.19966	2.30731	4.56505	3.96781	4.14174	3.20676	3.62628	4.05851	4.27154	4.0529	4.05851	6.27365	5.38372	3.07641	4.91078	3.66993	2.48761	4.73626	3.5502	4.14174	2.30731	2.60379	2.60379	2.01237	2.60379	3.5502	3.37274	4.14174	2.90134	3.07641	4.14174	3.07641	3.07641
1229154	12.93	0.0051	40	6.14172	3.24905	2.97107	2.77304	2.10087	2.02364	1.62452	1.82253	1.90791	1.55292	2.29743	1.43093	2.49674	2.97107	1.90791	3.17109	2.57744	2.29743	1.82253	2.77304	2.49674	2.5686	2.5686	2.35609	2.13311	1.71976	2.14374	3.41963	2.14374	2.99396	2.78123	2.5686	2.34642	2.99396	2.78123	2.14374	2.5686	2.78123	3.84551	5.3498
1229155	16.72	0.0071	47	4.82073	1.96999	2.0271	1.96999	1.51091	1.76201	1.3514	2.17907	1.55558	1.76201	2.30135	1.82564	1.6273	2.30135	1.6273	1.6273	1.43338	2.501	2.97615	2.30135	2.77778	2.77778	2.77778	2.77778	3.73168	3.2686	3.05936	3.73168	3.73168	3.68861	3.93998	2.85078	3.05936	3.2686	2.64302	2.38896	3.73168	3.47838	3.31713	3.2686	2.17907	2.64302	3.05936	2.17907	2.38896	2.64302
1229156	17.84	0.0067	30	7.18361	3.67604	3.25747	1.75601	1.75601	2.17164	1.71684	1.75601	2.59061	1.75601	1.75601	2.59061	2.17164	2.38082	2.84107	2.59061	3.04894	3.04894	3.67604	3.71896	3.67604	3.67604	3.71896	2.80088	5.22046	3.71896	3.67604	5.42911	5.22046	6.51493
1229157	21.91	0.0196	39	4.96674	3.2505	3.2505	2.48337	1.71684	2.00894	2.00894	3.43367	2.48337	1.71684	2.30338	2.19243	1.71684	3.2013	3.19421	2.56422	4.0516	2.34242	3.4138	4.47696	5.11517	4.046	3.83896	3.62636	6.6322	3.85664	3.64507	4.28019	4.49213	4.72819	2.98886	3.43367	4.06835	4.06835	5.36187	4.70416	4.28019	5.36187	6.42028
1229158	21.18	0.0141	40	3.62	2.8698	2.715	2.715	1.81	1.81	2.41333	2.5686	2.11167	2.41333	3.01667	2.715	2.8698	2.11167	2.11167	4.525	3.47244	4.82667	3.92167	4.07529	4.22333	4.07529	3.77385	4.37677	4.07529	4.67827	4.37677	3.01667	3.17109	4.97979	2.8698	4.07529	3.17109	3.77385	3.31833	3.17109	4.07529	2.8698	3.31833	4.07529
1229159	22	0.0159	37	4.76164	3.33315	2.48337	2.38082	1.90466	1.71684	1.71684	1.42849	2.19243	1.90466	2.38082	2.66822	2.85699	2.38082	3.14413	3.43367	2.66822	2.85699	4.68968	4.25894	4.22688	3.49259	5.15491	6.81764	4.98951	4.39002	4.85594	4.98951	3.32634	4.85594	4.39002	3.02655	4.85594	3.32634	4.68968	4.85594	4.68968
1229160	20.3	0.0113	32	4.98951	2.72705	2.56422	2.12947	3.62636	1.06474	1.66317	1.66317	2.26366	1.83184	3.16569	2.12947	3.02655	2.56422	2.72705	2.72705	2.56422	3.32634	4.09058	2.72705	4.22688	4.09058	3.32634	3.62636	3.79142	3.14413	5.91671	6.97544	4.86061	6.20842	4.67515	3.2505
1229161	24.06	0.0291	52	5.96755	3.40136	3.62019	2.77177	1.4881	2.55986	2.77177	2.97619	2.77177	4.04471	2.77177	2.55102	1.92504	2.58621	2.16795	3.04375	4.12765	3.91987	4.08915	3.04375	3.91987	3.46063	3.87931	4.79614	4.42361	4.30452	3.36126	4.59892	4.12765	5.3654	4.89408	4.77725	4.08915	5.14175	3.32748	4.95829	3.13878	4.85234	2.95333	2.1887	3.13878	3.61395	2.95333	3.13878	2.95333	2.66368
1229162	28.06	0.0391	47	6.19787	4.6672	3.24497	2.77177	3.42783	2.00552	2.00552	2.47915	2.95333	2.00552	2.47915	4.19283	3.24497	2.00552	2.47915	2.1887	3.71872	2.77177	3.24497	3.71872	4.19283	3.71872	5.43237	3.53812	4.6672	4.01105	3.65745	4.54952	5.01719	3.95431	4.54952	3.95431	3.95431	5.31463	4.2517	3.48665	3.95431	4.2517	4.42361	4.54952	5.01719	4.2517	5.61241	5.48618	5.61241	4.72015
1229163	17.19	0.0065	33	5.72982	3.62636	2.26366	2.56422	1.80692	1.36353	2.10807	1.96328	1.96328	1.96328	2.26366	2.56422	2.26366	2.56422	2.86491	2.56422	3.16569	3.16569	2.56422	3.76742	3.02655	3.16569	2.26366	2.56422	2.86491	3.91499	4.21614	3.31268	3.91499	6.17547	4.51729	6.02306	5.42075
1229164	17.77	0.0093	33	6.43399	2.34808	2.34808	2.16795	2.13645	1.71392	3.00641	2.13645	2.34808	2.34808	1.71392	2.37677	2.48824	2.42384	3.63265	2.68901	2.89147	2.89147	3.56357	3.63265	3.56357	3.90254	3.42783	2.95333	1.71392	2.95333	4.19283	3.90254	4.19283	3.42783	4.6672	4.37739	3.71872
1229165	24.44	0.0273	42	5.56388	3.30705	2.10448	3.1603	1.80384	1.20256	1.80384	2.10448	2.25981	4.81025	2.70577	3.1603	2.10448	2.70577	3.76101	2.40513	3.60769	4.66235	5.11089	5.86442	4.96285	4.81025	7.06665	4.20897	5.26336	6.46552	6.01281	5.56388	4.81025	4.06143	5.99022	4.6672	4.08915	4.37739	4.85234	6.09122	6.27756	6.75271	5.61643	3.61395	4.19283	5.80244
1229167	19.68	0.0107	37	4.81844	3.61383	3.01153	2.40922	1.80692	2.40922	2.40922	3.31268	2.40922	3.01153	3.31268	2.56422	2.71038	2.71038	2.40922	4.21614	3.61383	2.71038	3.31268	2.40922	3.61383	3.01153	3.31268	2.71038	2.40922	3.46653	2.71038	2.71038	3.01153	4.81844	1.80692	2.26366	2.10807	4.21614	3.61383	4.36931	4.81844
1229169	14.72	0.003	30	5.61241	2.76361	2.56867	2.56867	2.66368	1.66034	1.95994	2.10448	1.95994	1.95994	3.1603	3.0214	2.55986	2.55986	1.66034	3.46063	3.1603	2.86004	3.32068	3.65745	2.42384	2.25981	1.53297	1.95994	1.66034	2.42384	1.82873	2.42384	2.55986	3.48665
1229170	21.08	0.0133	46	4.10457	3.50453	2.2714	1.8381	3.0369	1.96999	2.43627	2.43627	1.66886	1.66886	1.66886	2.43627	2.13675	2.57299	2.43627	2.43627	2.19992	2.86675	3.63248	3.44541	2.38896	3.15488	3.63248	2.67734	2.10446	2.01581	3.34455	4.39984	4.5878	2.86675	3.34455	2.35043	2.99907	2.99907	2.5641	3.63876	3.21224	3.4188	2.78598	3.4188	2.99907	3.21224	3.63248	3.42547	2.78598	4.05983
1229171	20.16	0.0116	37	4.57217	4.76164	4.28548	3.33315	3.43367	3.5249	2.66822	1.42849	1.90466	2.85699	3.14413	1.90466	3.14413	2.57305	2.95836	2.57305	3.80932	3.40716	4.0516	4.47189	5.96252	5.54072	6.38842	3.07117	4.01788	2.30338	4.78539	4.13469	3.2505	3.07117	3.36699	4.01788	5.07958	3.66368	4.78539	4.90241	4.31185
1229172	21.89	0.0173	53	5.9765	2.90134	2.73171	2.60379	1.50833	1.96663	1.81	1.50833	1.81	1.66601	1.50833	2.11167	1.81	2.26752	2.11167	1.81	2.26752	3.01667	2.10087	2.90134	2.02364	2.29743	2.29743	2.69819	4.04728	2.49674	2.49674	2.02364	3.64505	2.90134	4.11971	2.69819	3.37274	3.17109	3.17109	3.17109	3.92167	4.25018	3.64505	3.17109	3.84551	4.11971	3.17109	3.17109	3.17109	2.90134
1229173	12.48	0.0028	29	5.26336	2.70577	3.1603	1.80384	2.40513	2.10448	2.10448	1.5032	2.10448	1.95994	1.80384	2.10448	2.10448	2.10448	2.70577	2.40513	2.55986	3.30705	2.10448	3.30705	3.00641	3.46063	3.30705	2.10448	2.68901	2.83624	2.28961	1.95994	3.09528
1229175	22.1	0.0135	46	5.81233	4.09612	4.09612	3.14413	2.38082	1.71684	1.71684	1.90466	1.71684	1.42849	1.42849	1.24168	1.71684	1.90466	3.14413	1.42849	2.00894	2.38082	2.00894	2.57305	4.68968	5.96252	2.76831	2.77649	3.6201	3.62636	4.25894	4.26426	4.25894	4.25894	5.11517	4.90241	3.83305	3.33315	4.6703	3.5249	4.00091	4.86527	2.38082	1.90466	1.81942	3.33315	4.19457	5.1461	4.95303	5.1461
1229176	22.19	0.0179	41	5.65815	3.91499	2.02019	2.76831	5.1856	1.62176	2.29351	1.55028	1.62176	1.81942	1.3468	1.42849	2.02019	2.49248	2.30338	2.89639	2.12947	1.96328	1.83184	2.42797	2.59935	5.92054	2.89639	3.19421	3.49259	3.49259	4.25894	5.62197	3.79142	5.45411	3.02655	3.62636	3.62636	4.39002	4.39002	4.09058	5.88983	7.11703	4.39002	5.88983	6.21937
1229177	17.94	0.0074	40	5.33644	1.71684	2.19243	1.53558	0.952329	1.06474	1.71684	1.90466	1.71684	2.19243	2.48337	2.19243	2.48337	3.2505	4.38485	2.66822	2.77649	3.43367	1.90466	2.77649	3.43367	4.19998	3.43367	2.19243	1.81942	4.85594	5.1196	3.97818	3.30583	4.04039	5.93966	2.49248	3.51202	2.22323	2.02019	2.22323	2.63401	2.02019	3.10056	2.22323
1229178	19.63	0.0111	43	4.9713	2.71038	1.36353	1.20461	1.20461	1.50576	2.86491	2.10807	1.36353	2.71038	3.16569	1.50576	2.86491	3.61383	2.56422	2.40922	1.96328	3.61383	2.86491	2.71038	3.16569	2.56422	2.10807	3.46653	3.61383	4.9713	3.46653	4.6703	4.6703	2.10807	3.16569	4.9713	3.91499	3.16569	2.86491	3.01153	3.16569	2.71038	1.66317	3.01153	4.36931	4.06835	4.36931
1229179	31.97	0.0919	58	6.60384	3.19585	2.33844	2.13645	1.27551	2.13645	2.55986	1.70068	2.98377	3.62019	2.86004	2.55986	2.25981	3.46063	3.76101	3.32068	2.86004	2.86004	2.55986	2.10448	3.91987	2.55986	4.06143	3.32068	3.1603	3.76101	4.81964	5.41988	4.36188	5.11973	3.62019	6.62092	4.21969	6.92127	4.81964	6.02032	5.72008	5.11973	4.81964	3.76101	4.81964	5.11973	8.58012	3.76101	2.86004	3.62019
1229180	25.1	0.0292	55	4.90241	2.59935	2.59935	2.00894	1.83184	3.07117	1.53558	3.07117	2.59935	1.83184	3.07117	1.83184	2.77649	3.36699	2.30338	2.59935	2.30338	3.36699	2.00894	2.12947	2.30338	3.07117	3.36699	3.07117	4.13469	3.36699	4.60675	5.37454	5.96632	5.67016	5.37454	4.90241	6.43791	5.37454	3.66368	5.67016	5.07958	3.36699	4.13469	4.90241	5.37454	4.43114	4.31185	2.12947	5.07958	4.13469
1229181	15.38	0.0072	24	5.62197	2.72705	2.12947	4.09058	3.19421	3.49259	2.72705	2.42797	2.12947	3.32634	1.83184	2.12947	2.29351	2.38082	2.76831	3.33315	3.33315	3.5249	5.34069	6.09788	4.00091	5.42911	4.28548	3.91499
1229182	21.39	0.0166	46	6.48759	3.17109	2.41333	1.96663	2.11167	1.20667	1.50833	1.66601	2.41333	1.66601	2.11167	1.20667	1.50833	2.26752	1.81	2.26752	2.41333	2.11167	1.96663	2.41333	3.17109	2.11167	2.26752	2.11167	2.38488	2.35609	4.525	3.86322	4.28749	3.68231	3.65129	4.73626	4.49979	3.01667	3.43953	3.43953	4.31394	4.07529	3.22797	3.65129	4.525	6.00688	4.10311	5.15929	7.09077	4.28749
1229183	20.2	0.0136	35	5.82225	2.48761	3.62628	2.48761	2.19617	2.78123	2.67277	3.62628	2.30731	2.86186	2.48761	3.43953	2.96341	3.73141	3.43953	3.91586	3.62628	5.15929	3.73141	3.91586	4.68313	4.39233	4.39233	3.14949	3.62628	4.10311	2.67277	4.10311	4.20714	3.62628	3.43953	3.14949	3.62628	4.57997	4.68313
1229184	19.18	0.0108	33	4.28749	3.22797	2.14374	2.14374	1.71976	2.14374	2.60379	3.07641	2.60379	2.30731	1.5382	2.13311	3.37274	2.30731	3.07641	3.66993	4.14174	4.14174	4.14174	3.37274	4.43871	4.14174	4.61461	2.90134	2.60379	4.91078	3.37274	4.14174	3.37274	4.43871	4.14174	3.66993	5.20757
1229185	23.7	0.0201	43	6.40936	3.42783	2.98377	2.34808	2.98377	2.13645	1.71392	1.2931	1.92504	2.13645	1.70068	2.34808	2.37677	2.13645	2.13645	2.98377	2.98377	3.00641	2.98377	2.34808	2.13645	2.55986	3.00641	3.408	2.79612	2.98377	3.85008	2.34808	4.48449	3.85008	2.98377	3.42783	3.19585	3.42783	3.83243	3.42783	4.90791	3.85008	3.63887	5.11973	6.19787	4.90791	4.69616
1229186	18.9	0.0112	43	6.34202	4.6817	2.86004	3.0214	1.36121	1.66034	1.53297	1.95994	1.95994	2.72242	2.55986	3.18878	3.0214	2.25981	2.42384	3.91987	3.78497	3.32068	3.62019	2.12585	3.1603	3.48665	2.55986	4.6817	2.95333	4.48449	3.53812	3.42783	3.24497	3.24497	2.77177	2.95333	3.06594	4.01105	3.13878	3.83243	3.24497	3.71872	2.47915	2.77177	3.71872	3.24497	3.24497
1229187	22.44	0.0188	41	7.48891	3.65745	1.95994	2.00552	1.82873	2.89147	3.18878	2.59493	1.23957	1.82873	2.42384	1.23957	2.42384	2.89147	1.53297	2.89147	2.29946	3.18878	3.95431	2.59493	3.95431	2.77177	3.95431	3.18878	3.95431	2.77177	2.89147	4.42361	3.65745	3.95431	4.2517	3.83243	3.18878	3.36126	4.38255	3.91987	3.71264	4.38255	5.67248	3.71264	5.92956
1229188	17.09	0.0093	32	5.89988	3.17109	4.23409	1.96663	1.20667	1.96663	1.96663	1.96663	1.36585	1.96663	1.81	1.96663	1.96663	2.5686	1.96663	2.26752	2.5686	3.03171	2.26752	2.5686	1.96663	2.26752	3.01667	2.5686	3.62	3.62	4.07529	4.22333	4.07529	3.62	3.62	4.07529
1229190	19.33	0.0132	33	6.97544	3.54415	1.71684	1.06474	1.24168	1.24168	1.71684	1.53558	2.00894	3.2505	2.48337	2.77649	4.49213	3.07117	4.96674	4.01788	3.2505	5.25941	4.78539	6.81764	3.96105	4.68968	3.79142	4.09058	4.55727	4.39002	2.59935	3.62636	3.79142	4.25894	4.85594	6.81764	5.75352
1229191	19.54	0.0109	32	5.3654	2.77177	2.29946	2.29946	2.89147	1.71392	2.29946	3.78497	1.90142	2.12585	2.29946	3.06594	2.29946	2.59493	3.06594	3.36126	3.53812	4.2517	4.59892	4.48449	4.2517	2.95333	3.36126	5.52721	5.13735	3.90833	4.1057	3.238	3.71264	5.05309	6.67192	5.25046
1229193	22.5	0.0225	50	5.41988	1.95994	1.5032	1.36121	1.80384	1.66034	1.95994	2.10448	1.80384	2.72242	1.66034	2.10448	1.66034	1.95994	2.86004	3.1603	2.25981	2.86004	1.95994	3.1603	2.86004	3.18878	3.30705	3.0214	3.30705	4.38255	4.36188	3.00641	4.38255	5.03966	3.71872	4.37739	4.19283	4.37739	4.01105	4.08915	4.6672	4.19283	3.13878	3.90254	2.95333	3.42783	5.14175	4.95829	4.6672	4.08915
1229195	13.68	0.0053	24	5.03431	3.49855	2.90134	1.96663	2.13311	2.60379	2.73171	2.43211	2.43211	1.83497	1.5382	1.96663	1.83497	2.13311	2.73171	2.90134	2.73171	2.13311	2.13311	2.90134	4.86423	4.56505	3.66993	3.79789
1229196	16.59	0.0087	30	6.74547	3.37274	2.13311	1.83497	2.60379	1.83497	2.60379	2.30731	2.13311	1.5382	3.37274	4.43871	2.30731	2.13311	2.30731	1.36585	2.60379	3.07641	3.37274	2.13311	3.07641	3.96781	3.07641	3.19966	3.07641	2.60379	2.90134	3.19966	2.60379	2.90134
1229197	22.06	0.0163	35	5.46342	3.63255	2.13311	2.13311	2.26752	1.96663	1.5382	1.66601	4.39751	2.26752	2.43211	3.03171	4.39751	3.03171	4.86423	3.33202	5.76333	4.09756	3.63255	3.49855	4.09756	4.47952	4.90614	4.05851	3.41297	4.69283	4.26621	5.9765	5.11945	6.39932	4.69283	6.61607	8.1058	6.40287	6.82594
1229198	24.99	0.0358	47	4.36931	4.52732	2.86491	1.80692	1.96328	1.20461	2.26366	2.56422	2.56422	1.80692	3.16569	2.56422	2.56422	2.56422	4.06835	3.46653	2.56422	2.86491	1.96328	5.45411	4.68968	5.75352	4.25894	4.98951	4.85594	4.98951	5.75352	5.75352	6.51841	5.15491	5.15491	6.14234	4.90241	6.32062	4.90241	2.59935	5.37454	3.2505	4.13469	4.60675	3.83896	3.54415	5.96632	5.84733	9.2135	5.07958
1229199	21.36	0.0189	56	4.40503	2.30135	2.58185	1.82564	2.38896	2.10446	2.0271	1.6273	1.43338	1.82564	2.10446	2.30135	2.86675	1.6273	1.3514	2.14741	1.93491	2.99907	2.99907	2.78598	2.14741	2.57299	2.78598	2.36012	2.78598	2.14741	3.44541	3.21224	3.21224	3.02182	2.57299	2.99907	2.99907	3.65753	3.85208	3.44541	3.21224	3.63876	3.44541	3.42547	3.44541	2.57299	3.85208	2.36012	2.78598	3.65753
1229200	20.39	0.0113	30	4.23409	3.33202	2.5686	2.26752	1.96663	1.96663	1.96663	2.26752	3.33202	1.96663	2.26752	4.53505	4.23409	5.1372	3.93325	4.69768	5.1372	3.93325	4.23409	6.00688	4.04728	4.65877	3.37274	4.45406	2.84592	5.39638	4.86423	7.82591	7.76462	8.02966
1229201	21.78	0.0193	46	7.50301	3.17651	1.08953	1.43338	1.08953	1.15068	2.0271	1.3514	1.6273	1.55558	2.0271	1.82564	1.6273	2.0271	2.97615	2.9063	2.0271	1.82564	2.501	2.501	2.0271	1.82564	1.82564	1.82564	2.7028	2.0271	2.97615	2.501	3.3785	2.9063	3.17651	3.45203	3.3785	4.0542	3.17651	4.12675	3.17651	4.06545	3.63876	2.99145	2.99907	3.85208	3.84615	5.35895	4.05983	5.57197
1229202	16.99	0.0062	35	5.1371	2.501	2.23083	1.08953	1.3514	1.82564	1.08953	1.82564	1.76201	1.82564	1.76201	2.0271	1.55558	2.43627	2.30135	2.64302	2.7028	2.43627	2.501	2.7028	3.78633	2.23083	3.11116	2.7028	2.23083	2.97615	2.7028	2.30135	2.7028	3.45203	3.3785	3.17651	2.77778	4.25745	5.9523
1229203	21.33	0.0193	50	5.76333	4.47952	3.41963	1.70648	1.9198	1.49317	1.27986	1.93161	2.34642	1.9198	2.13311	1.93161	2.77304	3.19966	1.93161	1.70648	2.98635	2.34642	2.5686	2.77304	2.34642	2.35609	2.13311	4.0529	2.35609	3.83959	3.64505	3.44614	3.17109	3.64505	3.44614	3.44614	4.11971	3.64505	4.04728	3.24905	4.79356	3.41297	5.1239	2.55973	3.41297	2.98635	2.78123	4.90614	4.90614	4.27154
1229204	13.41	0.0054	34	4.69768	2.98635	1.9198	1.70648	1.93161	2.34642	1.49317	1.70648	1.71976	1.70648	1.70648	2.13311	2.14374	1.49317	2.34642	2.13311	2.78123	2.77304	3.14949	2.57744	2.67277	3.05414	2.96341	2.86186	2.86186	1.90791	1.90791	1.62452	1.43093	2.57744	3.24905	2.86186	2.29743	2.86186
1229205	17.74	0.0105	39	6.51271	3.0369	3.17651	2.87471	1.66886	3.17651	2.87471	1.51091	2.57299	2.87471	2.73638	2.11528	3.33771	1.81309	3.33771	2.57299	2.87471	2.87471	3.7803	3.93998	3.47838	4.5428	3.3785	2.43627	3.3785	2.31125	2.43627	2.60824	3.08167	3.67621	2.13675	2.31125	2.13675	1.8381	2.01581	1.8381	2.13675	2.43627	3.08167
1229206	16.86	0.0065	39	4.87254	3.20513	2.13675	1.36819	1.36819	1.66886	2.13675	1.8381	1.66886	1.54083	1.96999	1.66886	1.54083	1.96999	1.54083	1.66886	1.66886	2.13675	2.13675	1.8381	1.96999	1.36819	1.54083	1.96999	1.54083	1.66886	1.36819	1.54083	1.96999	2.23083	2.7028	3.11116	2.9063	2.0271	1.76201	1.76201	3.17651	2.85078	3.78633
1229207	15.83	0.0072	32	2.80566	2.5686	2.80566	3.43953	3.01667	1.93161	2.10087	2.57744	2.38488	2.38488	2.38488	2.86186	2.38488	3.53092	2.86186	3.33884	4.00774	3.05414	4.10311	3.33884	3.72531	2.86186	2.86186	4.57997	2.96341	2.30731	2.78123	2.96341	3.84551	3.73141	2.78123	3.37274
1229208	19.3	0.0115	39	6.86759	3.65753	2.13675	1.93491	3.02182	1.92308	1.51091	2.14741	1.93491	1.7227	2.14741	2.57299	3.21224	3.21224	2.59947	4.27884	2.81046	3.63876	4.93308	3.44541	3.11116	2.7028	2.9063	3.99178	3.78633	4.0542	3.99178	3.78633	3.99178	4.25745	3.58185	5.1371	2.43627	2.9063	2.23083	2.9063	2.43627	4.66674	4.46167
1229209	23.61	0.0225	46	4.07529	2.41333	2.8698	2.5686	2.26752	1.83497	0.905	1.20667	1.50833	1.66601	1.20667	2.715	1.66601	1.96663	2.01237	2.78123	3.25604	3.07641	5.26838	3.07641	4.31921	3.5502	4.49979	4.61461	4.79356	4.02474	5.85731	4.02474	9.16243	4.96148	3.05414	4.67827	3.53092	4.00774	3.72531	3.05414	4.4846	5.63156	5.63156	6.58505	7.2557	5.63156	5.63156	4.96148	4.67827	2.10087
1229211	15.58	0.0051	39	5.3802	2.59947	1.7227	1.93491	1.93491	1.29974	1.51091	1.08953	1.51091	1.93491	1.93491	2.14741	2.17907	1.93491	2.78598	3.02182	2.59947	3.44541	2.58185	2.86675	4.30013	4.01459	3.53695	2.86675	3.82234	4.68626	3.63248	2.86675	2.77778	2.86675	1.91117	1.6273	1.7227	2.10446	2.10446	1.91117	2.67734	3.2546	3.15488
1229212	23.07	0.0284	50	6.78734	3.15488	3.92256	2.38896	2.67734	2.38896	2.19992	2.49186	1.43338	1.7227	1.43338	1.7227	2.19992	1.7227	2.38896	2.96847	3.63248	3.44541	3.82234	3.44541	3.63248	4.39984	4.39984	4.39984	3.82234	4.69113	4.87723	4.77792	4.39984	4.69113	4.11012	4.5878	2.96847	3.34455	2.19992	2.96847	2.67734	2.77778	4.25745	5.20333	4.80175	3.78633	5.47693	5.4056	3.17651	3.17651
[truncated: 19 more columns]

## Sheet: Station_30_otolith
Specimen_No.	Standard_length	Weight	Increment_number	Increment_1	Increment_2	Increment_3	Increment_4	Increment_5	Increment_6	Increment_7	Increment_8	Increment_9	Increment_10	Increment_11	Increment_12	Increment_13	Increment_14	Increment_15	Increment_16	Increment_17	Increment_18	Increment_19	Increment_20	Increment_21	Increment_22	Increment_23	Increment_24	Increment_25	Increment_26	Increment_27	Increment_28	Increment_29	Increment_30	Increment_31	Increment_32	Increment_33	Increment_34	Increment_35	Increment_36	Increment_37	Increment_38	Increment_39	Increment_40	Increment_41	Increment_42	Increment_43	Increment_44	Increment_45	Increment_46
1208201	26.94	0.0385	49	6.69469	2.38488	2.01237	1.43093	1.71976	1.71976	1.5382	1.43093	1.71976	2.48761	2.67277	2.78123	3.43953	3.14949	3.43953	2.78123	4.8689	4.49979	4.39233	4.39233	3.44614	4.87357	5.15488	4.20173	5.1372	6.00688	5.1372	5.3498	4.49979	4.4846	4.71218	5.79483	4.05851	5.58287	5.56246	5.08825	3.73141	4.02474	4.49979	3.72531	3.05414	4.3507	5.27701	5.6477	6.15651	5.89988
1208202	24.8	0.0246	44	3.53695	2.10446	3.05936	3.73168	1.91117	1.82564	2.10446	3.53695	2.38896	2.30135	2.58185	2.10446	2.86675	2.77778	3.05936	3.2546	3.82234	4.88191	4.93308	4.7299	5.00201	4.0542	4.93308	4.5277	4.25745	4.5277	5.4056	3.85208	3.78633	4.32659	4.5277	3.3785	5.1371	4.5277	2.9063	2.57299	2.71964	3.7803	3.47838	5.29035	3.17651	4.08226	4.08226	4.9883
1208203	18.39	0.0091	33	5.81259	2.30135	2.43627	2.9063	3.58185	2.7028	2.7028	2.23083	4.40503	3.50453	4.40503	3.50453	4.40503	2.73638	3.97459	2.9063	2.7028	2.97615	2.43627	3.17651	2.9063	2.31125	2.78598	3.26161	3.3785	2.49186	3.26161	3.55626	3.08167	3.26161	2.78598	2.01581	3.08167
1208204	20.94	0.0141	49	3.3785	3.3785	1.54083	1.8381	1.24593	1.8381	2.31125	1.66886	2.31125	2.01581	2.60824	1.8381	2.60824	1.7227	1.36819	2.60824	2.31125	1.8381	2.49186	1.8381	2.60824	2.13675	4.32659	3.3785	3.08167	4.91917	3.67621	4.91917	4.6225	3.67621	3.17651	4.68626	3.92837	3.7803	3.7803	2.71964	3.47838	3.0369	2.57299	3.0369	3.33771	3.33771	3.33771	2.2714	3.33771	3.33771
1208205	25.49	0.0313	57	4.53505	2.715	1.96663	1.81	1.50833	1.50833	2.26752	3.31833	2.8698	3.62	4.07529	2.5686	2.715	2.5686	2.11167	2.78123	2.13311	2.48761	2.90134	3.66993	3.37274	4.14174	3.84551	4.26621	2.48761	3.19966	5.38372	5.20757	4.43871	3.96781	4.31921	4.73626	4.61461	4.73626	4.43871	4.14174	3.37274	4.61461	4.43871	4.14174	3.37274	4.97521	2.96341	2.78123	2.19617	3.07641
1208206	22.43	0.0146	47	5.46033	2.19992	1.43338	1.24593	1.54083	1.43338	1.43338	1.54083	2.19992	1.7227	1.7227	2.67734	1.28205	1.7227	2.14741	1.7227	1.92308	2.57299	2.57299	3.23349	2.57299	3.63876	3.21224	2.99907	2.78598	4.08226	4.72024	5.14598	4.29482	4.70571	4.50748	4.72024	3.42547	4.08226	3.85208	2.99907	3.44541	2.78598	1.7094	2.36012	2.36012	2.14741	2.78598	2.99907	3.65753	4.27884
1208207	20.47	0.0149	42	4.38425	2.11528	2.2714	2.41746	1.66886	2.11528	2.11528	2.87471	2.71964	2.2714	2.41746	2.57299	1.81309	1.81309	1.06838	2.11528	2.71964	1.96999	2.59947	2.64302	3.89921	3.47838	2.38896	3.68861	2.17907	2.81046	3.21224	3.86982	3.42547	2.81046	2.57299	2.11528	2.2714	3.17651	3.47838	2.57299	1.81309	1.66886	1.81309	3.7803	3.7803	3.47838
1208208	20.46	0.0121	51	4.98372	2.01581	1.06838	1.24593	0.770417	1.8381	1.24593	1.7227	1.54083	2.31125	1.8381	2.01581	0.955585	1.8381	1.7227	2.31125	1.8381	2.49186	2.31125	1.54083	2.78598	3.26161	2.78598	3.3785	4.32659	3.73779	3.85208	4.32659	4.32659	3.55626	4.32659	3.26161	2.60824	2.49186	2.30135	1.91117	2.58185	1.91117	1.6273	3.05936	3.2546	3.05936	2.30135	1.91117	2.30135	2.58185
1208209	20.46	0.0141	48	4.07529	2.26752	2.41333	2.8698	1.81	2.26752	2.26752	2.41333	2.8698	2.11167	1.66601	2.11167	1.66601	2.11167	2.26752	3.01667	1.96663	4.37677	6.34218	4.67827	4.37677	3.47244	4.07529	4.97979	4.67827	3.81582	4.57997	4.57997	3.62628	4.57997	3.33884	3.14949	2.86186	4.10311	2.67277	2.86186	2.19617	3.81582	2.19617	3.33884	3.62628	3.62628	2.86186	3.03171	2.8698	3.63255
1208210	30.12	0.0494	50	4.99803	2.5686	2.5686	1.96663	1.96663	2.5686	2.43211	2.26752	5.1372	2.5686	1.96663	2.8698	3.03171	3.77385	3.33202	3.63255	3.47244	2.5686	3.33202	4.83609	4.83609	3.93325	5.43837	4.83609	5.59915	6.5016	5.1372	4.83609	6.66404	6.80257	5.43837	4.83609	6.2007	5.59915	7.7058	5.29852	5.43837	3.93325	5.08825	6.51209	4.20714	5.26838	5.56246	5.56246	6.98735	4.97521
1208211	26.36	0.0312	49	6.16704	1.96999	3.78633	2.64302	3.05936	2.85078	1.76201	2.23083	1.96999	2.43627	3.05936	3.31713	3.2686	3.31713	3.52402	3.31713	5.00201	3.17651	4.6027	4.12675	4.80175	4.32659	4.32659	3.65128	3.45203	2.97615	4.32659	3.45203	5.00201	4.80175	2.77778	2.97615	3.85208	4.32659	4.32659	2.10446	4.12675	5.47693	6.35302	5.079	5.27739	2.9063	5.55556	4.5277	2.97615	4.12675
1208212	22.82	0.0194	40	6.40313	3.63248	3.53695	1.7227	2.38896	3.73168	4.11012	3.05936	2.67734	3.34455	1.15068	1.91117	2.67734	2.58185	2.58185	2.86675	2.19992	3.34455	3.05936	3.34455	2.38896	2.58185	3.15488	3.82234	2.86675	3.34455	3.53695	3.05936	3.15488	2.86675	3.05936	2.86675	4.11012	3.05936	3.82234	3.34455	2.86675	3.05936	3.15488	2.86675
1208213	17.81	0.0085	39	5.64523	3.26161	3.15488	2.96847	3.15488	3.26161	2.19992	2.38896	1.7227	1.54083	1.43338	2.01581	1.91117	1.7227	2.01581	2.67734	2.49186	2.49186	3.15488	3.92256	2.67734	2.49186	3.97459	3.20513	3.97459	2.01581	2.43627	2.9063	3.67621	3.20513	3.67621	2.31125	2.9063	3.67621	2.9063	1.8381	2.60824	2.13675	2.13675
1208214	24.1	0.0206	52	5.20757	2.60379	2.90134	2.60379	1.83497	0.953954	2.13311	2.60379	2.13311	2.30731	1.83497	1.83497	1.83497	1.5382	1.66601	1.5382	1.83497	2.01237	2.43211	1.83497	3.07641	2.90134	2.13311	2.78123	4.00774	3.33884	3.33884	3.05414	3.53092	4.10311	5.43837	3.53092	4.4846	5.05686	4.00774	3.81582	4.00774	3.53092	5.24675	3.81582	2.86186	3.53092	2.38488	2.38488	2.57744	3.05414
1208215	20.07	0.0101	39	3.22797	4.10311	1.93161	1.29752	1.759	1.71976	2.14374	1.96663	2.35609	1.71976	1.759	2.14374	1.71976	2.38488	2.80566	3.01667	2.14374	3.01667	3.89255	2.59504	3.24905	3.72531	4.67827	3.72531	5.3498	4.67827	5.63156	5.15488	4.87357	5.15488	4.59485	3.05414	2.86186	3.44614	5.3498	2.10087	4.00774	5.3498	4.87357
1208217	22.86	0.0159	43	5.93065	2.90134	1.36585	1.5382	2.43211	1.5382	2.43211	2.43211	2.60379	3.19966	2.43211	2.90134	3.33202	2.90134	3.19966	3.96781	3.79789	3.66993	4.26621	3.96781	4.56505	3.81582	3.91586	4.76977	2.96341	3.81582	3.62628	2.67277	3.62628	3.43953	2.38488	2.67277	2.19617	2.19617	3.81582	3.91586	4.29279	4.68313	6.96452	5.34555	4.10311	3.14949	4.10311
1208218	14.62	0.0047	35	5.3802	1.93491	2.36012	2.78598	1.51091	1.51091	2.78598	1.29974	1.51091	1.93491	2.14741	1.93491	1.93491	2.57299	2.57299	2.14741	3.44541	2.57299	3.23349	3.44541	1.93491	2.14741	2.99907	3.86982	2.14741	2.36012	2.38896	1.92308	1.93491	1.29974	1.7227	2.78598	2.59947	1.93491	2.36012
1208219	22.67	0.0162	44	4.96996	2.86675	3.2546	1.91117	2.19992	3.05936	2.10446	3.53695	2.67734	2.30135	2.38896	1.7227	2.58185	5.44767	4.01459	4.96996	4.77792	5.9254	4.96996	3.73168	4.77792	3.26161	2.78598	4.03162	3.26161	3.44541	3.08167	4.03162	2.78598	2.78598	4.98372	3.73779	4.03162	2.31125	3.73779	3.55626	2.97615	3.85208	2.77778	3.17651	4.7299	4.80175	2.501	4.32659
1208220	23.6	0.021	46	6.24063	2.73638	1.8381	3.0369	2.43627	2.9063	2.43627	2.73638	2.60824	3.50453	4.40503	6.41026	3.50453	3.50453	3.20513	4.40503	4.87254	4.74436	3.0369	5.64119	3.0369	2.9063	3.80438	3.97459	4.10457	5.17253	3.67621	5.47276	3.50453	3.97459	4.57285	2.73638	3.0369	2.13675	3.33771	2.43627	2.13675	2.43627	1.96999	1.66886	3.33771	2.9063	1.96999	2.73638	3.50453	2.73638
1208221	22.09	0.0158	42	5.1372	2.5686	2.8698	1.96663	1.81	2.5686	2.8698	2.5686	1.96663	3.47244	3.17109	3.03171	2.41333	1.66601	2.5686	3.17109	3.93325	4.07529	3.93325	3.47244	3.17109	4.23409	5.1372	3.17109	4.4846	5.56246	4.71218	4.4846	5.3498	5.77516	6.83926	4.92466	4.69768	5.1372	4.49979	6.2007	5.33703	4.07529	4.05851	3.84551	2.5686	3.20676
1208222	20.3	0.0116	36	5.54608	3.84551	2.34642	1.70648	2.34642	1.71976	2.55973	2.34642	2.13311	2.98635	2.5686	2.98635	2.8698	3.33202	4.23409	4.23409	5.43837	3.33202	3.93325	2.8698	3.93325	4.07529	3.63255	3.93325	2.26752	3.47244	2.43211	1.96663	3.17109	2.5686	2.5686	2.73171	2.5686	2.26752	3.17109	3.03171
1208223	23.18	0.0186	38	4.14174	2.90134	2.60379	2.13311	1.71976	1.06655	1.82253	1.62452	1.62452	2.29743	2.49674	2.10087	2.77304	2.57744	3.92167	4.11971	3.43953	4.61461	4.02474	2.19617	3.25604	4.31921	3.5502	4.31921	4.49979	4.49979	4.79356	6.80591	3.84551	4.31921	4.49979	4.49979	4.31921	5.56246	4.97521	6.80591	5.56246	3.84551
1208224	19.1	0.0105	42	5.35469	2.01581	2.86675	3.26161	2.19992	2.19992	1.91117	2.58185	4.01459	2.58185	3.53695	1.82564	1.91117	2.38896	2.10446	1.91117	3.2546	3.34455	3.73168	3.2546	2.67734	5.34188	4.66674	3.11116	2.9063	5.1371	2.7028	2.43627	2.23083	2.64302	3.11116	2.9063	2.43627	2.9063	3.3785	2.60824	1.8381	2.60824	3.20513	3.67621	3.50453	2.13675
1208225	19.21	0.0086	37	5.59242	3.62619	3.02182	2.57299	2.41746	2.71964	2.11528	1.96999	1.81309	2.11528	3.32401	4.38425	2.11528	3.47838	3.62619	3.02182	3.17651	3.02182	2.57299	3.21224	2.99145	3.63876	3.42547	3.63876	2.57299	3.63876	2.99907	2.35043	3.42547	3.21224	3.42547	2.78598	3.21224	2.77778	2.78598	3.63876	2.36012
1208226	16.44	0.0049	32	4.70571	2.14741	2.35043	1.51091	1.28205	1.28205	1.7227	1.7094	1.51091	2.13675	2.36012	1.7094	2.14741	3.26161	3.73779	3.73779	4.98372	4.32659	3.92256	5.27739	4.03162	4.21433	3.73779	4.32659	2.96847	3.73779	2.49186	2.78598	4.5878	2.38896	3.44541	4.39984
1208227	27.14	0.032	55	2.63851	1.96663	2.22703	2.22703	2.63851	1.34909	1.82253	2.22703	2.02364	2.49674	2.49674	1.82253	3.57574	2.49674	2.49674	2.02364	2.49674	3.64505	2.90134	3.17109	2.49674	3.37274	3.37274	4.11971	3.57574	3.37274	3.64505	4.04728	5.46758	3.84551	5.59915	3.64505	4.31921	4.51997	4.92466	4.51997	4.0529	5.1239	5.55018	3.83959	3.53092	3.24905	3.81582	2.29743	3.53092	3.72531
1208228	20.04	0.0099	43	5.16369	2.77778	3.2546	2.10446	2.38896	1.82564	1.6273	2.38896	1.6273	1.6273	2.10446	1.6273	1.6273	1.91117	1.82564	2.38896	4.20891	2.30135	1.91117	2.97615	4.68626	2.77778	4.6027	2.58185	2.77778	4.88191	3.53695	3.45203	3.53695	3.45203	4.68626	3.45203	4.68626	3.45203	2.77778	2.64302	3.11116	2.85078	2.7028	2.17907	2.43627	2.23083	2.23083
1208229	19.72	0.0103	41	3.47838	2.85078	2.81046	3.05936	2.85078	1.51091	1.96999	2.59947	1.76201	3.7803	2.41746	1.66886	1.51091	2.11528	2.2714	2.41746	1.96999	3.02182	3.17651	3.32401	3.7803	3.7803	3.17651	3.93998	2.87471	3.17651	4.24133	4.38425	3.63876	3.47838	4.38425	4.24133	3.17651	2.2714	2.87471	2.87471	2.57299	2.57299	2.2714	2.57299	3.17651
1208230	25.16	0.0249	44	5.1372	2.11167	1.96663	1.81	1.36585	2.11167	2.5686	2.11167	2.26752	2.41333	2.8698	3.01667	3.77385	2.8698	2.715	4.07529	3.77385	4.31394	4.56006	4.73626	4.10311	4.56006	2.38488	3.68231	4.10311	4.31394	3.22797	4.10311	3.89255	3.47244	2.63851	4.81251	5.89988	3.93325	6.10829	5.69184	7.03602	4.14174	5.27701	4.56006	3.51801	3.51801	3.93325	2.38488
1208231	21.87	0.0151	33	5.24675	2.19617	2.38488	2.57744	3.05414	2.86186	4.10311	4.43871	5.1637	5.33276	5.33276	5.93065	5.1637	5.33276	5.1637	6.10083	4.09756	5.93065	3.66993	5.1637	4.86423	5.33276	6.99711	3.79789	5.03431	6.52953	4.56505	3.49855	3.49855	2.90134	2.90134	3.49855	2.43211
1208232	23.67	0.0198	49	7.00907	3.63876	3.50453	1.96999	1.54083	1.66886	1.96999	2.13675	1.66886	2.13675	3.02182	2.14741	3.23349	3.23349	1.51091	1.29974	1.51091	3.44541	2.36012	1.93491	3.02182	3.65753	2.38896	6.42804	5.47693	4.88191	3.3785	3.05936	2.501	2.77778	2.7028	2.10446	4.80175	4.6027	5.27739	4.40503	6.07379	3.33771	3.33771	4.10457	4.70571	4.70571	3.20513	4.08226	3.62619	4.38425
1208233	23.19	0.0172	41	5.27739	2.30135	2.58185	2.77778	3.65128	2.58185	4.32659	2.77778	3.45203	2.97615	3.65128	2.77778	2.501	2.58185	2.7028	2.77778	2.97615	3.45203	3.65128	5.44767	3.73168	2.64302	2.81046	3.52402	3.47838	5.90996	3.73168	4.56785	4.82073	3.93998	5.44767	3.68861	3.05936	5.70157	5.02932	3.47838	4.14882	5.02932	4.40503	5.44767	2.85078
1208234	21.07	0.0147	41	5.64119	2.58185	3.73168	2.38896	2.30135	3.53695	2.58185	1.82564	2.10446	2.38896	2.10446	2.58185	2.30135	2.38896	2.77778	3.05936	2.77778	3.3785	3.78633	5.34188	4.87254	4.66674	4.46167	4.25745	4.66674	3.99178	3.78633	3.58185	2.9063	4.12675	3.65128	3.3785	3.17651	2.58185	3.17651	3.85208	4.12675	3.3785	2.77778	3.85208	3.65128
1208235	20.68	0.0114	43	6.95676	1.7227	2.17907	2.38896	3.47838	1.7227	1.55558	1.7227	1.76201	1.7227	2.38896	1.96999	1.7227	1.51091	1.96999	3.05936	2.59947	2.9063	3.0369	2.43627	3.80438	5.47276	3.0369	5.00657	4.40503	3.80438	3.50453	3.0369	4.40503	3.0369	2.73638	1.66886	3.0369	3.50453	3.33771	2.13675	2.73638	3.63876	1.8381	2.43627	2.2714	2.73638	2.73638
1208236	22.9	0.0171	44	6.31337	2.30135	2.58185	2.10446	2.77778	1.3514	2.10446	1.91117	3.92837	3.52402	2.64302	4.61261	2.85078	2.23083	2.38896	2.31125	3.20513	3.97459	3.20513	1.8381	2.13675	2.60824	1.54083	2.43627	1.8381	1.8381	2.9063	3.20513	2.13675	4.14882	3.97459	6.88087	2.13675	2.60824	2.43627	2.9063	2.31125	4.87254	4.44629	3.97459	3.67621	2.60824	3.97459	2.9063
1208237	14.99	0.0048	25	4.66674	3.99178	2.43627	2.23083	1.96999	2.7028	3.11116	3.05936	2.23083	2.7028	2.17907	2.501	3.58185	2.97615	3.3785	3.58185	4.5277	3.17651	3.11116	3.17651	4.0542	2.64302	4.0542	3.17651	3.58185
1208238	18.03	0.0081	34	4.56785	2.81046	3.02182	2.38896	2.38896	2.36012	1.76201	3.65753	1.96999	1.7227	3.68861	3.7803	2.87471	3.17651	4.84435	3.7803	3.93998	3.7803	4.24133	5.44767	4.68626	4.84435	3.7803	3.17651	3.63876	2.87471	4.38425	1.96999	3.47838	3.17651	2.57299	2.87471	2.87471	4.84435
1208239	20.81	0.0139	39	5.35469	1.91117	3.44541	2.19992	1.91117	1.91117	1.7227	3.44541	1.91117	1.91117	3.15488	2.96847	2.86675	2.96847	3.17651	2.41746	3.17651	3.02182	3.7803	3.7803	3.7803	3.62619	3.47838	4.08226	4.38425	5.89449	4.38425	3.02182	4.08226	2.87471	3.62619	3.17651	2.41746	2.57299	2.41746	2.2714	2.71964	3.17651	2.87471
1208240	23.41	0.0209	49	6.0512	2.11528	1.96999	2.41746	1.96999	1.20873	1.66886	1.81309	1.66886	2.11528	1.96999	1.81309	1.36819	2.57299	1.51091	2.57299	2.14741	2.14741	2.14741	3.42547	2.81046	3.21224	2.57299	3.44541	3.21224	4.29482	4.72024	5.14598	3.65753	3.23349	4.72024	3.42547	3.65753	3.85208	2.81046	3.42547	3.23349	2.99907	3.86982	2.99907	4.72024	4.08226	4.29482	4.08226	3.63876	4.50748
1208241	24.88	0.0215	55	4.05983	2.5641	2.57299	2.77778	2.13675	1.49573	1.49573	1.06838	1.92308	2.36012	2.35043	2.5641	1.8381	2.13675	1.54083	2.13675	2.01581	2.13675	2.60824	2.13675	2.9063	2.31125	3.20513	3.67621	2.9063	4.74436	3.3785	5.04292	4.44629	4.91917	3.97459	5.04292	4.44629	3.3785	3.67621	2.60824	3.20513	3.67621	3.20513	3.08167	4.2735	3.80438	3.20513	1.66886	1.36819	1.66886
1208242	23.48	0.0173	54	4.81251	2.38488	2.17535	2.43211	1.96663	2.17535	1.96663	1.96663	1.96663	1.71976	1.96663	2.17535	1.759	1.96663	1.759	2.38488	1.759	2.17535	1.34909	2.59504	2.63851	2.57744	4.87357	2.57744	2.86186	1.62452	2.57744	3.72531	3.05414	2.29743	3.53092	4.20173	3.24905	5.15488	3.72531	3.05414	2.57744	3.53092	4.20173	3.44614	3.33884	3.72531	4.20173	4.39751	3.72531	3.81582
1208243	23.36	0.0153	44	4.91917	2.13675	2.60824	2.9063	2.60824	3.08167	2.31125	2.9063	2.01581	2.43627	2.01581	2.9063	2.60824	2.60824	2.9063	3.85208	3.3785	4.14882	3.67621	4.44629	4.74436	3.17651	5.00201	5.9523	5.00201	2.64302	2.43627	4.93308	3.58185	3.52402	3.3785	5.079	3.58185	2.43627	2.23083	3.3785	3.78633	6.6925	3.99178	3.78633	3.58185	3.78633	3.52402	3.3785
1208244	18.64	0.0076	33	5.60872	3.0369	2.57299	1.8381	1.96999	1.66886	1.66886	2.2714	1.66886	1.96999	5.77319	4.40503	3.33771	4.70571	3.63876	2.57299	2.73638	4.70571	3.93998	3.33771	4.08226	4.08226	3.47838	2.87471	3.32401	2.2714	4.38425	5.29035	4.08226	3.7803	4.08226	4.9883	4.08226
1208245	19.22	0.0084	37	5.26838	3.84551	2.02364	2.10087	1.55292	1.62452	2.49674	3.17109	1.82253	1.34909	2.10087	1.55292	3.68231	3.22797	3.01667	3.22797	3.47244	3.65129	3.89255	3.63255	3.77385	3.63255	4.56505	4.86423	3.19966	3.19966	3.19966	2.73171	3.49855	4.26621	3.49855	3.03171	3.19966	1.83497	2.43211	2.43211	2.43211
1208246	17.6	0.0069	38	5.54733	2.7028	2.7028	1.96999	3.78633	1.82564	2.43627	1.55558	2.23083	2.23083	2.9063	2.7028	2.7028	2.57299	3.0369	2.57299	3.17651	2.57299	3.93998	3.63876	4.5428	2.2714	2.87471	2.57299	3.17651	3.93998	4.5428	2.57299	3.33771	3.47838	2.87471	3.0369	2.87471	2.57299	2.2714	1.96999	1.51091	2.2714
1208247	21.43	0.0109	42	2.57299	1.93491	1.28205	3.21224	3.63876	2.14741	2.78598	2.13675	2.99907	2.14741	2.57299	3.42547	2.5641	3.42547	4.29482	4.06545	4.70571	4.50748	4.06545	5.99815	2.9063	3.11116	3.3785	3.85208	4.66674	5.4056	5.20333	4.66674	5.20333	4.93308	2.7028	4.25745	3.11116	3.17651	2.9063	2.23083	2.7028	2.9063	3.58185	2.7028	2.64302	3.3785
1208248	18.02	0.0061	33	5.62092	2.36012	2.38896	3.23349	1.93491	2.36012	1.93491	3.02182	2.17907	2.78598	2.59947	2.64302	3.31713	2.85078	2.9063	3.05936	2.9063	3.31713	4.40503	4.19805	2.64302	2.64302	3.52402	3.52402	2.43627	3.31713	1.96999	1.96999	2.99907	2.36012	2.57299	2.57299	2.13675
1208249	21.91	0.0157	48	6.6377	2.35043	3.21224	1.92308	1.7227	2.13675	2.14741	2.5641	2.57299	2.5641	3.21224	2.14741	2.5641	3.42547	3.21224	3.55626	3.08167	2.78598	3.08167	3.3785	2.60824	3.55626	3.20513	4.6225	3.08167	3.08167	3.85208	4.14882	4.14882	3.3785	3.55626	3.08167	3.67621	3.85208	3.85208	3.3785	4.40503	3.33771	2.43627	2.73638	2.73638	2.73638	2.2714	3.0369	2.43627	3.0369
1208250	17.83	0.0083	32	5.81259	2.60824	2.13675	2.31125	2.13675	2.31125	2.43627	3.67621	4.50748	5.68954	4.14882	3.55626	2.60824	2.78598	3.08167	3.55626	2.31125	3.33771	3.80438	3.93998	2.43627	4.24133	2.73638	3.33771	3.0369	3.33771	3.0369	2.43627	2.57299	2.43627	3.33771	3.63876
1208251	26.01	0.0371	48	4.05851	2.59504	1.49317	3.01667	1.93161	1.71976	2.78123	2.35609	2.5686	1.71976	4.07529	2.14374	2.78123	3.22797	3.20676	3.22797	3.47244	3.17109	3.47244	2.8698	4.37677	4.97979	2.8698	5.1372	5.28132	3.47244	6.04087	4.07529	4.53505	4.37677	4.23409	3.63255	4.53505	3.93325	3.93325	3.93325	4.53505	3.93325	4.83609	6.2007	6.2007	3.33202	3.93325	5.43837	4.69768	3.93325
1208252	21.33	0.0118	43	3.85208	2.60824	2.78598	1.54083	1.7227	1.8381	1.8381	1.54083	2.19992	2.31125	2.60824	2.01581	3.85208	2.60824	2.19992	2.31125	3.3785	3.05936	2.97615	4.12675	4.32659	4.12675	3.92837	3.45203	5.079	4.61261	2.7028	3.52402	2.64302	2.43627	4.19805	3.52402	3.31713	2.17907	3.78633	2.43627	1.55558	1.76201	2.17907	2.9063	2.85078	3.11116	2.85078
1208253	20.93	0.0116	40	5.19894	2.36012	2.38896	2.38896	1.29974	2.36012	1.7227	2.17907	2.81046	1.7094	1.7227	1.92308	1.7227	3.21224	2.99907	2.5641	4.08226	2.99145	2.57299	4.49226	4.72024	3.85208	4.27884	4.70571	6.2113	4.93308	4.06545	6.2113	2.99145	4.93308	4.06545	2.57299	3.85208	4.06545	3.42547	2.7028	2.501	2.7028	2.7028	3.92837
1208254	21.92	0.0145	44	5.64119	2.10446	2.501	3.05936	2.38896	2.58185	1.82564	2.7028	3.3785	3.3785	2.7028	3.3785	2.43627	4.5277	2.0271	3.85208	3.3785	4.0542	4.70571	2.13675	2.78598	5.13265	5.98672	5.55966	4.2735	6.20026	3.42547	3.85208	4.70085	4.49226	4.49226	5.13265	2.77778	4.27884	4.49226	4.70571	4.29482	3.63876	2.99145	3.65753	3.42547	2.99145	4.29482	5.55966
1208255	19.9	0.0143	41	4.14882	3.3785	3.3785	1.8381	1.8381	1.54083	2.13675	1.7227	2.13675	3.85208	2.43627	2.49186	2.9063	3.08167	3.67621	4.11012	3.89921	3.68861	3.89921	2.85078	3.89921	5.62092	4.9883	2.81046	2.85078	3.23349	2.17907	4.9883	5.40982	3.47838	2.59947	3.2686	3.2686	4.11012	2.59947	2.81046	3.05936	3.23349	2.81046	3.05936	2.59947
1208256	18.31	0.0098	39	5.67749	2.501	2.97615	2.501	1.82564	1.76201	1.82564	1.43338	3.58185	3.85208	1.82564	2.77778	4.7299	2.41746	2.41746	3.32401	3.62619	2.87471	3.92837	3.92837	3.02182	3.62619	3.62619	3.92837	4.38425	3.62619	3.62619	3.92837	4.23055	5.1371	3.47838	3.92837	3.02182	2.71964	2.41746	2.87471	2.71964	2.71964	1.96999
1208257	20.89	0.014	46	4.88191	2.501	3.05936	2.77778	2.0271	0.955585	1.6273	1.82564	1.6273	1.6273	2.10446	2.43627	2.13675	2.31125	2.13675	2.13675	2.73638	1.8381	3.50453	2.43627	1.54083	3.50453	2.73638	2.9063	3.97459	4.10457	3.20513	2.9063	2.43627	3.50453	3.67621	3.97459	3.20513	2.13675	2.43627	3.0369	2.60824	4.2735	3.80438	3.97459	3.20513	2.73638	2.9063	2.60824	2.43627	2.9063
1208258	26.11	0.0258	52	3.73168	2.85078	2.64302	2.85078	2.7028	2.64302	1.96999	1.96999	1.96999	2.43627	2.0271	2.10446	2.10446	1.91117	2.501	2.58185	2.38896	2.30135	3.05936	3.92837	3.92837	4.01459	3.92837	3.92837	3.73168	4.68626	4.20891	4.12675	4.96996	4.6027	5.35895	4.88191	6.7907	4.68626	3.2546	3.17651	4.12675	5.00201	3.85208	4.32659	2.97615	3.65128	3.45203	4.32659	2.77778	3.85208
1208259	20.2	0.0101	32	5.00657	3.33771	4.24133	2.73638	2.87471	2.2714	2.57299	3.33771	2.57299	2.43627	1.51091	4.10457	2.87471	3.0369	3.17651	3.63876	4.24133	3.63876	3.33771	5.44767	4.24133	4.10457	4.5428	2.57299	3.63876	2.57299	2.2714	2.2714	3.33771	2.57299	2.43627	2.57299
1208260	19.92	0.0119	36	4.39751	2.26752	2.43211	1.66601	2.13311	1.96663	2.26752	2.90134	3.73141	4.02474	2.96341	3.25604	4.20714	2.78123	3.73141	4.31921	4.97521	4.31921	3.25604	3.43953	2.48761	2.30731	3.84551	3.66993	3.49855	2.90134	4.43871	3.49855	4.43871	4.56505	4.43871	3.66993	5.03431	3.19966	2.90134	3.37274
1208261	20.12	0.0111	44	4.07529	2.14374	1.50833	1.50833	1.70648	2.80566	2.35609	2.14374	2.14374	2.35609	2.35609	1.93161	2.14374	2.5686	2.14374	2.35609	2.80566	2.78123	2.78123	2.80566	3.17109	2.5686	3.63255	3.77385	3.17109	2.8698	4.53505	3.77385	3.63255	3.77385	3.47244	2.26752	2.26752	1.96663	1.96663	2.8698	2.26752	2.26752	2.41333	2.26752	3.33202	1.81	2.8698	3.33202
1208262	25.02	0.0208	52	5.3802	3.23349	3.02182	3.02182	1.7227	1.51091	1.93491	2.81046	1.93491	3.23349	3.02182	1.7227	2.14741	2.57299	1.96999	2.99907	4.11012	3.3785	4.32659	2.97615	5.00201	4.0542	3.85208	4.80175	3.3785	4.6027	4.7299	4.12675	5.87898	4.12675	5.00201	5.87898	5.00201	3.85208	3.92837	4.0542	3.45203	4.32659	3.58185	3.85208	2.77778	3.85208	3.85208	2.97615	3.3785	3.3785
1208263	25.46	0.0246	52	4.39751	2.38488	2.10087	2.29743	3.05414	2.10087	1.90791	3.44614	2.86186	1.82253	2.57744	2.86186	3.53092	2.77304	3.53092	4.39751	3.81582	4.69768	4.53505	4.69768	4.83609	4.39751	4.23409	4.99803	6.36367	5.1372	5.59915	4.39751	5.29852	4.525	3.77385	3.31833	2.715	3.47244	3.31833	3.01667	3.01667	3.77385	2.41333	3.01667	3.47244	3.01667	2.41333	2.41333	3.47244	3.62
1208264	22.44	0.0165	43	6.89228	2.57744	2.97107	2.97107	3.44614	3.92167	3.37274	3.05414	3.73141	3.73141	3.73141	4.02474	4.49979	3.25604	4.20714	4.20714	4.20714	4.79356	4.68313	4.97521	5.56246	5.6356	5.3498	5.33703	6.41352	5.3498	5.56246	4.69768	4.07529	4.05851	4.69283	4.69768	2.98635	2.77304	3.62628	2.77304	3.19966	3.84551	4.26621	4.90614	3.62628	3.41963	4.0529
1208265	23.11	0.0145	37	5.93065	3.93325	3.49855	3.03171	4.26621	2.5686	3.49855	5.1637	2.43211	3.92167	4.11971	2.97107	2.97107	5.94215	3.64505	4.11971	4.59485	3.64505	2.29743	6.61607	4.11971	2.97107	2.97107	4.11971	3.44614	2.49674	3.33884	3.33884	2.67277	4.29279	3.81582	3.14949	2.86186	2.38488	1.90791	3.14949	3.81582
1208266	22.37	0.0155	43	6.82927	1.96663	1.96663	2.73171	1.50833	1.93161	1.759	1.50833	2.35609	1.759	1.71976	1.93161	1.96663	2.59504	2.59504	2.5686	2.80566	3.05414	3.65129	4.31394	3.68231	4.10311	4.10311	3.89255	3.68231	4.73626	4.525	3.26302	4.26621	3.96781	3.03171	2.90134	3.79789	3.19966	2.60379	5.1637	3.66993	3.79789	2.90134	3.49855	3.49855	3.49855	3.79789
1208267	21.52	0.0125	44	8.93361	3.25604	3.84551	2.30731	2.13311	2.01237	4.14174	2.30731	3.37274	3.25604	2.60379	5.38372	4.10311	3.62628	3.73141	4.10311	6.01067	3.14949	3.43953	4.10311	2.96341	2.86186	3.62628	3.25604	4.76977	3.43953	3.43953	3.62628	3.62628	3.62628	3.91586	3.62628	3.43953	2.57744	2.67277	2.30731	2.78123	2.60379	2.48761	4.07529	2.99396	3.20676	2.35609	2.78123
1208268	18.2	0.0069	33	6.95676	3.17651	2.87471	2.11528	2.87471	2.87471	1.81309	1.96999	1.36819	1.54083	2.13675	2.73638	2.73638	2.9063	2.57299	3.20513	3.3785	3.97459	2.73638	2.73638	4.2735	3.97459	4.2735	4.57285	4.2735	2.13675	5.0655	4.11012	4.77792	3.82234	2.38896	3.15488	2.67734
1208269	19.58	0.0088	44	4.53505	1.66601	2.5686	1.96663	1.36585	1.66601	1.50833	2.26752	1.36585	1.66601	2.60379	2.30731	2.30731	1.83497	2.30731	2.30731	3.66993	2.78123	2.60379	3.07641	3.37274	3.37274	3.07641	2.60379	3.84551	1.83497	3.37274	3.37274	3.14949	4.10311	3.62628	3.62628	3.62628	4.57997	3.43953	3.33884	2.67277	3.43953	3.14949	3.73141	3.43953	4.68313	3.91586	2.67277
1208270	18.38	0.0088	39	3.58185	2.43627	3.3785	2.23083	3.31713	2.9063	2.7028	2.23083	2.85078	2.9063	3.78633	3.3785	2.9063	2.23083	3.78633	3.31713	3.58185	3.78633	3.99178	2.501	4.01459	3.05936	2.97615	2.86675	2.43627	3.33771	3.33771	3.63876	2.57299	2.13675	2.87471	2.43627	3.0369	2.57299	2.2714	2.43627	2.57299	2.73638	3.0369
1208271	17.91	0.0073	34	4.51997	4.31921	2.22703	2.49674	4.11971	4.04728	2.02364	2.02364	2.69819	3.64505	2.69819	2.22703	2.97107	2.49674	3.64505	3.17109	3.64505	3.37274	4.11971	2.69819	2.97107	2.48761	2.73171	2.01237	3.79789	3.07641	3.96781	2.13311	2.90134	3.37274	2.90134	2.90134	4.43871	3.19966
1208272	18.4	0.0088	35	6.41352	3.41963	1.9198	3.20676	3.84551	3.41963	4.27154	1.90791	2.30731	1.90791	2.48761	3.5502	2.19617	2.78123	2.96341	2.19617	2.96341	2.78123	3.14949	2.30731	2.96341	2.67277	2.96341	2.11167	2.5686	3.01667	2.715	1.81	2.8698	1.81	2.41333	3.31833	3.77385	3.92167	4.07529
1208273	22.8	0.0162	46	4.5428	2.87471	2.57299	2.11528	2.2714	1.51091	1.36819	2.38896	2.9063	2.85078	2.43627	3.47838	3.11116	2.64302	3.2686	2.85078	2.23083	3.3785	2.60824	3.80438	4.44629	3.50453	3.97459	4.44629	3.0369	3.97459	3.67621	3.67621	4.10457	3.3785	5.04292	4.2735	3.67621	3.20513	2.9063	3.97459	3.0369	2.31125	2.73638	1.8381	3.20513	3.20513	2.60824	3.67621	3.20513	3.50453
1208274	18.32	0.0071	36	4.65877	3.51801	2.63851	1.759	1.759	2.17535	2.02364	1.759	2.17535	1.96663	2.69819	2.63851	2.63851	2.17535	2.22703	3.14949	3.05414	2.48761	3.81582	3.14949	3.81582	3.62628	4.29279	3.62628	3.33884	3.14949	3.33884	3.91586	4.00774	2.96341	4.10311	3.53092	2.67277	2.67277	2.86186	3.33884
1208275	21.57	0.0116	40	6.49052	1.66317	3.76742	2.72705	2.26366	2.26366	1.50576	1.96328	2.26366	2.72705	2.77649	3.36699	1.66317	2.30338	4.25894	3.36699	2.12947	2.89639	3.07117	2.89639	5.02573	3.66368	4.72819	4.72819	3.66368	2.72705	3.62636	3.46653	4.09058	3.16569	3.62636	4.22688	3.62636	3.46653	3.76742	3.16569	3.16569	3.62636	3.46653	4.06835
1208276	19.36	0.0097	35	8.89022	3.25604	2.19617	1.83497	2.19617	3.25604	2.01237	2.67277	2.19617	2.13311	2.13311	3.49855	3.49855	3.66993	3.79789	3.96781	2.73171	2.13311	2.90134	1.66601	3.96781	3.49855	3.96781	3.19966	2.73171	2.43211	2.90134	3.19966	2.43211	2.43211	3.66993	2.73171	2.90134	2.73171	2.90134
1208277	23.27	0.0183	48	4.57997	2.19617	1.83497	1.14871	1.5382	0.953954	1.2438	4.20714	2.96341	1.71976	1.71976	1.43093	2.01237	1.90791	3.25604	2.38488	2.96341	4.02474	2.67277	2.69819	4.04728	2.90134	4.04728	2.97107	2.69819	3.57574	3.57574	3.37274	4.31921	3.57574	4.25018	4.72183	4.04728	4.72183	3.37274	4.51997	4.51997	5.12833	3.17109	3.17109	2.43211	4.51997	3.57574	2.59504	4.10311	3.22797
1208278	16.31	0.0049	33	5.15929	2.80566	2.80566	2.35609	2.38488	2.80566	1.71976	1.27986	1.96663	1.50833	2.99396	4.10311	3.22797	3.01667	2.80566	2.35609	2.17535	1.71976	4.07529	3.01667	3.89255	2.78123	3.68231	3.65129	4.73626	5.15929	3.89255	4.73626	2.5686	3.68231	3.86322	3.65129	3.01667
1208279	16.99	0.0062	38	4.88191	2.97615	2.30135	2.30135	1.43338	1.6273	1.6273	2.30135	1.82564	2.10446	1.82564	2.10446	2.10446	2.77778	2.501	3.2546	2.77778	3.2546	3.17651	4.20891	3.85208	3.17651	2.23083	3.3785	2.9063	2.97615	3.3785	2.501	2.0271	2.9063	3.85208	4.46167	3.17651	2.0271	3.17651	2.86675	2.38896	2.58185
1208280	23.16	0.0171	45	3.11116	2.0271	2.64302	2.501	1.76201	1.55558	2.43627	3.52402	2.23083	1.55558	2.43627	3.11116	2.78598	2.96847	3.08167	3.55626	3.85208	3.73779	3.85208	4.80175	4.32659	5.86732	5.09695	3.73779	4.6225	3.55626	2.78598	4.03162	3.85208	2.49186	3.08167	2.31125	3.26161	3.08167	3.55626	2.77778	5.13265	3.63248	4.06545	3.4188	4.27884	2.99145	2.13675	2.77778	2.99907
1208281	23.01	0.0161	43	6.37454	1.66886	1.66886	1.66886	2.73638	1.36819	1.36819	1.66886	1.36819	2.2714	1.96999	2.43627	2.2714	2.43627	2.73638	2.87471	2.43627	4.10457	3.02182	3.7803	5.29035	5.1371	4.08226	6.49868	5.29035	5.43928	4.68626	5.89449	8.00926	3.92837	4.68626	4.08226	3.32401	3.92837	2.87471	2.2714	2.2714	3.17651	1.96999	3.7803	2.87471	4.5428	3.47838
1208282	19.39	0.0093	39	5.82225	3.22797	2.14374	2.17535	1.27986	1.71976	1.50833	1.96663	1.71976	2.35609	2.17535	2.14374	2.59504	3.22797	2.96341	3.14949	3.81582	3.62628	3.43953	3.91586	3.33884	4.20714	4.10311	3.91586	4.57997	3.14949	3.14949	3.62628	2.86186	3.62628	3.43953	2.48761	2.10087	3.25604	2.86186	3.43953	3.33884	3.91586	2.96341
1208283	23.91	0.0192	44	6.21902	2.35609	2.5686	1.93161	1.9198	2.80566	4.27154	1.93161	2.14374	1.93161	1.93161	1.93161	2.78123	2.97107	3.24905	2.97107	4.20173	3.44614	2.97107	3.24905	3.37274	3.96781	3.66993	4.26621	4.73626	4.43871	4.86423	3.66993	4.14174	4.39233	3.14949	3.62628	3.91586	3.81582	4.20714	3.33884	3.43953	3.91586	5.82225	4.57997	4.10311	4.10311	4.8689	3.91586
1208284	21.32	0.0135	42	4.46167	1.76201	1.82564	1.76201	1.55558	1.3514	1.82564	1.96999	1.82564	2.0271	2.0271	1.29974	2.7028	1.82564	1.96999	2.9063	2.38896	2.36012	2.57299	2.38896	2.81046	2.57299	3.44541	3.23349	4.08226	3.89921	4.08226	3.23349	3.65753	3.23349	2.81046	2.81046	2.57299	3.02182	4.74436	4.50748	2.81046	4.08226	3.02182	3.44541	4.95616	4.53274
1208285	21.58	0.0156	44	4.70571	1.96999	2.2714	2.43627	1.96999	2.43627	1.96999	1.96999	1.96999	2.43627	1.96999	2.2714	2.2714	2.73638	2.2714	3.0369	4.24133	2.73638	4.24133	3.80438	3.93998	4.24133	4.10457	3.93998	3.20513	2.9063	2.43627	4.2735	3.50453	3.50453	2.43627	3.50453	2.9063	1.66886	2.9063	3.50453	3.20513	2.73638	2.13675	2.43627	2.13675	2.13675	2.13675	3.50453
1208286	20.58	0.0129	43	5.02073	1.93161	1.55292	2.17535	3.05414	1.08767	1.55292	1.71976	1.96663	1.96663	1.50833	2.22703	1.71976	2.38488	2.43211	2.59504	3.51801	3.47244	3.05414	3.93325	4.56006	4.14174	4.14174	3.93325	3.68231	5.02073	3.72531	3.64505	3.64505	4.51997	3.64505	2.49674	4.31921	2.97107	2.69819	2.69819	2.29743	2.02364	2.49674	4.11971	3.17109	3.17109	4.25018
1208287	18.46	0.0089	36	6.92192	2.19617	2.30731	2.60379	2.78123	2.30731	1.71976	1.5382	2.01237	2.30731	2.30731	1.83497	2.78123	2.01237	3.07641	2.78123	3.07641	2.96341	3.19966	3.49855	2.43211	3.79789	3.19966	4.56505	3.66993	4.86423	3.79789	3.96781	3.47244	4.23409	3.63255	3.77385	4.23409	4.53505	2.26752	2.8698
1208288	15.27	0.0051	33	5.38372	2.60379	2.90134	3.37274	2.13311	2.30731	2.60379	2.13311	1.83497	2.30731	2.30731	2.48761	2.60379	2.19617	2.78123	2.60379	2.78123	4.02474	3.73141	3.84551	3.25604	4.02474	2.48761	2.78123	2.78123	2.48761	2.30731	3.07641	2.19617	2.60379	2.96341	2.78123	2.30731
1208289	23.86	0.0219	46	4.57997	2.29743	2.86186	2.86186	4.39233	2.10087	1.90791	2.38488	2.19617	1.34909	2.38488	2.78123	2.67277	2.96341	2.38488	2.01237	3.43953	4.20714	4.39233	4.73626	4.14174	4.73626	4.61461	4.73626	4.43871	4.61461	4.26621	4.43871	4.31921	5.80268	3.66993	3.37274	5.1637	3.93325	4.69768	3.03171	2.73171	2.8698	3.03171	3.63255	2.73171	3.03171	3.63255	3.33202	3.93325	2.73171
1208290	29.68	0.0442	58	4.86423	2.90134	2.69819	2.43211	2.22703	2.63851	2.22703	2.02364	1.759	2.69819	2.63851	2.69819	3.10585	2.22703	3.10585	2.43211	3.31147	2.22703	3.98497	2.90134	2.43211	3.84551	3.37274	2.43211	2.49674	3.10585	2.69819	2.69819	3.77987	3.84551	1.96663	3.17109	4.72183	3.77987	3.57574	4.04728	3.77987	5.39638	4.92466	4.25018	6.07093	5.59915	6.00688	6.27365	3.84551	5.33276
1208291	19.69	0.0113	40	6.41707	2.77304	2.29743	2.22703	1.90791	2.49674	1.82253	2.29743	2.49674	2.57744	2.02364	2.29743	2.49674	3.24905	3.17109	4.11971	3.03171	4.86423	3.49855	5.1637	3.49855	3.79789	3.19966	3.37274	2.60379	3.66993	2.60379	3.37274	2.60379	3.66993	2.90134	3.37274	2.13311	4.61461	3.19966	3.07641	2.60379	3.19966	3.37274	3.37274
1208292	19.87	0.0104	37	4.56505	2.90134	1.36585	2.60379	2.43211	2.90134	2.90134	2.13311	1.36585	2.13311	1.5382	1.36585	1.83497	3.49855	2.13311	3.33202	2.43211	3.19966	3.33202	3.49855	3.19966	3.33202	3.96781	3.77385	3.47244	3.17109	3.47244	3.77385	4.07529	2.715	4.07529	4.23409	4.07529	3.77385	2.715	2.5686	2.26752
1208293	22.68	0.0195	47	6.89082	1.43338	1.91117	2.19992	2.49186	2.38896	2.19992	2.67734	2.49186	1.91117	2.19992	3.44541	3.44541	1.91117	2.01581	3.08167	2.31125	1.8381	2.60824	3.08167	2.60824	3.3785	3.3785	3.3785	2.60824	3.3785	3.3785	4.6225	3.3785	3.3785	3.3785	2.60824	2.60824	2.31125	3.3785	3.08167	5.30758	3.0369	2.87471	5.30758	3.93998	4.10457	4.24133	3.33771	3.63876	3.63876
1208294	21.14	0.0161	46	5.079	3.45203	1.91117	1.3514	1.43338	1.6273	1.82564	2.10446	1.82564	1.91117	2.0271	1.91117	2.0271	1.91117	2.30135	3.31713	3.3785	3.11116	4.25745	3.78633	5.1371	3.99178	4.46167	4.25745	4.93308	3.78633	2.7028	3.78633	2.9063	2.43627	3.3785	2.23083	2.9063	3.78633	2.64302	2.23083	3.73168	1.91117	1.7227	1.82564	1.7227	2.30135	2.58185	2.58185	3.15488	2.30135
1208295	19.54	0.0133	32	5.55556	3.45203	3.85208	2.77778	2.77778	2.9063	2.60824	2.60824	1.8381	2.9063	1.8381	2.60824	2.13675	3.50453	2.9063	2.31125	3.67621	2.13675	2.60824	2.9063	2.9063	2.60824	2.43627	2.31125	2.9063	3.20513	4.74436	3.67621	3.97459	2.60824	3.50453	3.85208
1208296	19.21	0.0099	38	7.05452	3.3785	2.78598	1.8381	1.66886	1.7227	1.66886	1.24593	2.31125	2.43627	3.85208	3.08167	2.9063	3.08167	4.23055	3.17651	3.32401	3.17651	3.02182	3.62619	3.7803	3.92837	3.47838	2.71964	4.38425	3.32401	3.7803	3.62619	3.47838	3.17651	3.32401	2.2714	2.41746	4.08226	3.17651	3.62619	2.2714	3.7803
1208297	21.03	0.0143	45	5.44767	2.67734	2.86675	1.6273	2.19992	2.86675	2.19992	3.53695	3.15488	1.91117	3.15488	2.10446	1.7227	3.82234	2.19992	2.13675	3.08167	2.60824	2.78598	2.60824	3.3785	2.78598	4.14882	3.55626	3.3785	3.85208	2.9063	3.26161	3.3785	3.67621	3.26161	4.44629	2.71964	4.08226	3.62619	4.53274	4.38425	3.32401	1.81309	3.17651	2.71964	3.0369	3.33771	3.80438	3.80438
1208298	26.77	0.0321	49	6.58245	3.0369	2.43627	2.60824	2.43627	1.36819	2.13675	2.13675	3.34455	2.19992	2.10446	2.01581	2.10446	1.7227	2.86675	3.15488	3.15488	3.15488	3.63248	4.11012	5.25572	3.92256	3.82234	4.39984	4.77792	4.11012	3.63248	3.63248	3.63248	4.11012	5.25572	5.54321	4.11012	3.92256	2.86675	4.11012	5.8322	3.05936	3.85208	3.45203	2.23083	2.77778	3.17651	2.501	3.85208	4.0542
1208299	25.4	0.0212	50	5.44767	2.38896	4.68626	4.30013	2.38896	2.58185	2.38896	3.05936	3.82234	3.34455	2.30135	2.86675	3.34455	3.05936	3.53695	4.01459	3.15488	2.58185	2.38896	3.53695	3.53695	4.01459	3.63248	3.73168	2.19992	3.73168	4.01459	4.11012	4.11012	3.82234	3.63248	3.34455	3.82234	3.63248	2.86675	3.82234	3.53695	3.92256	3.53695	3.63248	3.82234	3.63248	2.58185	3.63248	4.30013	3.34455
1230001	26	0.0233	47	5.27701	2.38488	2.63851	3.31147	3.05414	2.02364	2.17535	2.63851	2.17535	2.43211	2.84592	3.93325	2.63851	3.31147	3.05414	1.83497	2.60379	3.84551	3.5502	3.66993	4.31921	4.91078	3.07641	3.37274	3.07641	3.37274	3.84551	5.38372	4.68313	4.20714	3.91586	3.43953	4.20714	3.43953	5.15929	5.45091	5.92681	5.15929	3.91586	3.73141	6.40287	5.15929	5.15929	5.15929	5.45091	5.92681
1230002	23.37	0.0183	52	7.00907	2.73638	2.43627	1.36819	2.13675	1.36819	1.66886	1.36819	1.8381	2.2714	2.43627	2.43627	2.13675	2.43627	2.13675	1.66886	2.01581	1.96999	1.8381	2.9063	1.66886	2.13675	3.20513	2.73638	3.20513	3.50453	3.50453	4.57285	3.20513	4.2735	4.87254	4.74436	5.00657	5.60872	4.40503	4.40503	5.00657	4.70571	3.63876	4.10457	5.30758	3.63876	3.93998	3.33771	3.80438	3.63876
1230003	30.02	0.0515	61	5.45411	4.09058	3.62636	2.12947	1.66317	1.66317	1.96328	1.66317	2.12947	2.26366	2.42797	3.02655	2.42797	3.02655	2.56422	2.42797	2.42797	1.96328	3.32634	3.79142	2.72705	1.66317	1.96328	2.42797	3.32634	1.96328	3.49259	2.26366	3.49259	3.32634	3.62636	6.33138	4.52732	3.62636	5.12845	3.92655	2.86491	3.46653	4.52732	3.62636	4.06835	4.82785	3.62636	3.62636	3.83896	3.4138
1230004	22.59	0.0207	43	4.72183	3.64505	2.49674	2.69819	2.22703	3.44614	1.55292	2.02364	1.82253	2.02364	1.55292	4.51997	2.77304	2.90134	3.84551	3.17109	4.51997	2.90134	3.84551	4.51997	3.37274	4.11971	4.25018	4.79356	4.92466	4.31921	4.72183	4.72183	4.51997	3.84551	6.62638	4.0529	3.41963	4.4846	3.63255	3.41963	3.20676	2.98635	2.55973	2.77304	4.0529	6.61607	4.47952
1230006	25.88	0.03	47	5.46758	2.57744	3.64505	3.24905	2.29743	1.82253	1.34909	2.29743	2.77304	2.10087	2.29743	2.49674	3.05414	2.69819	2.10087	3.64505	3.24905	3.44614	2.29743	5.07033	4.59485	5.26838	4.97521	5.6356	6.0371	3.91586	4.49979	5.74356	4.68313	3.25604	4.79356	3.91586	3.5502	3.91586	5.26838	4.68313	5.45091	4.79356	3.91586	3.53092	4.29279	4.87357	4.96148	6.10829	4.76977	5.43837
1230007	28.1	0.0417	48	5.43837	2.8698	2.26752	3.17109	2.8698	2.5686	3.17109	2.5686	2.5686	3.33202	3.47244	3.17109	4.07529	3.63255	2.8698	3.17109	3.17109	3.93325	4.67827	3.63255	3.77385	3.93325	3.47244	4.76977	4.57997	4.10311	6.48759	4.29279	5.53376	4.57997	6.01067	4.76977	5.53376	5.05686	6.96452	5.05686	4.57997	6.2007	5.53376	4.39233	4.10311	3.62628	4.39233	5.53376	4.39233	5.05686
1230008	24.73	0.0257	44	4.81251	4.14174	2.59504	1.759	1.96663	1.759	3.26302	2.17535	2.80566	2.63851	2.38488	1.96663	3.26302	2.63851	2.84592	2.80566	2.17535	2.30731	2.78123	4.14174	4.31921	3.66993	4.91078	5.08825	3.5502	4.91078	4.61461	3.5502	4.73626	4.61461	4.31921	5.67983	3.07641	4.61461	4.02474	4.14174	4.14174	4.31921	3.37274	3.37274	5.38372	5.08825	5.67983	6.15282
1230009	24.98	0.0334	47	5.07958	3.83896	2.48337	3.07117	1.83184	1.24168	1.53558	1.83184	2.77649	2.59935	3.36699	3.54415	3.54415	3.07117	5.84733	3.36699	2.77649	3.07117	2.77649	3.36699	3.36699	3.83896	3.07117	4.60675	5.07958	3.83896	3.83896	5.07958	4.90241	4.31185	5.37454	4.13469	3.83896	5.55298	4.90241	5.07958	3.83896	4.90241	3.83896	4.78539	3.36699	5.37454	7.38285	4.90241	4.78539	4.13469
1230010	27.18	0.0359	49	5.74356	2.30731	3.25604	2.01237	2.19617	2.78123	2.78123	2.78123	3.25604	2.96341	3.73141	2.60379	2.48761	1.71976	2.48761	2.01237	1.2438	2.48761	2.78123	2.30731	3.25604	4.20714	2.78123	4.31921	4.49979	4.68313	4.61461	4.49979	4.20714	4.10311	4.8689	4.20714	6.29899	3.43953	6.29899	6.87906	4.10311	5.92681	4.39233	4.8689	8.30817	5.6356	3.43953	5.82225	5.82225	4.68313
1230011	20.72	0.0142	42	5.84733	3.54415	2.77649	2.30338	2.00894	2.00894	2.30338	3.36699	3.83896	3.54415	2.77649	4.01788	2.77649	3.83896	3.36699	3.2505	4.60675	3.2505	3.36699	3.32634	3.92655	4.09058	3.92655	4.39002	3.62636	3.02655	2.86491	3.32634	4.09058	3.62636	3.49259	3.02655	3.32634	3.32634	3.32634	3.02655	4.22688	2.72705	3.92655	3.62636	3.32634	3.49259
1230012	20.9	0.009	36	5.67983	1.83497	3.07641	2.78123	2.30731	2.60379	3.84551	1.5382	4.61461	2.13311	1.5382	2.30731	2.30731	2.30731	2.60379	2.30731	2.30731	4.97979	2.41333	4.22333	3.17109	4.525	4.22333	3.96781	5.33276	2.90134	4.26621	4.86423	2.30731	3.49855	4.56505	3.37274	4.86423	4.43871	5.33276	4.26621
1230013	19.49	0.014	40	4.83609	3.03171	3.33202	2.5686	1.96663	1.96663	1.66601	1.81	1.36585	3.33202	1.96663	3.17109	1.96663	1.66601	3.63255	3.47244	3.33202	4.23409	3.03171	3.63255	3.17109	3.63255	3.93325	3.47244	3.33202	3.63255	3.17109	2.73171	3.17109	3.03171	2.78123	3.14949	2.30731	2.19617	3.5502	3.91586	4.49979	4.20714	4.49979	4.02474
1230014	18.62	0.0089	36	6.32062	3.07117	3.54415	3.36699	1.83184	2.77649	2.30338	2.59935	2.00894	2.59935	2.48337	2.76831	2.76831	2.76831	2.96601	2.76831	3.44027	2.09729	4.58702	2.76831	4.11269	3.24351	4.58702	3.91499	2.96601	3.24351	3.44027	2.29351	2.76831	2.29351	2.48337	3.43367	1.71684	2.48337	3.43367	2.95836
1230015	25.8	0.0231	42	5.76533	2.12947	2.35208	2.98886	3.4138	2.56422	2.12947	1.92832	2.98886	2.98886	2.98126	3.64507	2.55537	2.98886	3.4138	3.83896	4.06835	4.47696	4.0516	3.4138	4.47696	4.49213	4.0516	6.4026	4.68968	2.77649	2.35208	2.34242	3.2013	3.62636	3.85664	5.11517	3.2013	4.0516	4.28019	4.47696	5.11517	3.40716	3.40716	3.4138	4.89779	3.62636
1230016	17.32	0.0048	31	4.83609	4.37677	3.77385	2.5686	1.50833	1.36585	1.50833	1.66601	2.11167	2.5686	2.26752	2.8698	2.11167	3.17109	2.5686	3.17109	3.47244	2.5686	2.5686	4.37677	2.26752	5.28132	4.23409	4.07529	3.47244	2.5686	5.7396	4.37677	4.07529	3.77385	2.5686
1230018	25.67	0.0298	45	6.4489	2.13311	2.60379	1.66601	1.2438	2.13311	1.36585	1.5382	2.13311	2.30731	2.13311	1.5382	1.83497	1.36585	1.83497	1.2438	2.13311	2.43211	2.30731	2.13311	2.60379	2.13311	2.30731	3.19966	3.66993	3.96781	2.30731	5.03431	5.80268	4.43871	4.43871	3.49855	3.96781	5.5049	3.07641	4.56505	5.5049	6.57121	5.5049	4.43871	4.73626	5.20757	6.39932	5.80268	6.57121
1230020	26.54	0.0308	42	8.30817	3.93325	5.43837	2.26752	2.8698	3.77385	2.8698	2.8698	3.63255	2.5686	2.8698	2.49674	3.17109	4.51997	4.99347	3.17109	4.31921	3.84551	4.31921	6.0371	5.08825	6.33141	6.33141	4.02474	4.61461	4.31921	6.0371	4.79356	5.08825	5.85731	4.31921	4.49979	3.5502	5.08825	5.56246	3.5502	4.29279	3.81582	4.29279	5.24675	3.33884	3.81582
1230021	18.9	0.0113	30	5.15929	3.43953	2.01237	1.71976	2.01237	2.30731	2.67277	2.01237	4.02474	2.96341	2.96341	3.25604	3.25604	4.20714	2.96341	3.73141	3.73141	4.31921	3.91586	4.02474	3.43953	2.96341	4.49979	3.25604	5.45091	3.25604	3.43953	4.79356	4.49979	4.49979
1230023	16.02	0.0064	34	3.79789	3.63255	3.17109	1.83497	3.33202	2.5686	1.36585	2.26752	2.5686	2.43211	2.5686	2.73171	1.96663	1.96663	1.96663	1.96663	3.33202	2.26752	2.43211	3.03171	2.5686	2.26752	3.79789	2.02364	2.10087	3.05414	2.77304	1.82253	1.82253	2.77304	3.24905	3.05414	3.24905	3.17109
1230024	15.06	0.0035	26	5.53786	2.22703	1.759	2.02364	2.22703	1.96663	1.82253	1.759	2.02364	1.759	2.02364	2.22703	1.96663	2.49674	2.17535	3.77987	2.69819	3.10585	3.57574	3.31147	2.69819	3.03171	2.26752	3.63255	3.33202	3.33202
1230026	25.5	0.0275	43	5.73378	3.43367	3.43367	2.95836	2.95836	3.2505	2.66822	2.00894	1.71684	2.95836	2.30338	2.48337	2.19243	2.95836	4.01788	2.95836	3.14413	2.30338	3.2505	2.77649	3.54415	3.2505	2.77649	4.01788	4.13469	3.54415	3.72505	4.01788	2.89639	2.95836	5.07958	5.25941	4.31185	3.83896	4.31185	3.90919	3.90919	5.81233	5.04824	6.57728	5.15051	4.38485	4.57217
1230027	18.81	0.0088	48	4.31185	4.13469	2.77649	2.48337	2.00894	2.12947	1.53558	2.00894	2.48337	2.59935	1.53558	2.00894	1.83184	5.07958	5.07958	5.07958	3.54415	4.60675	2.95836	3.61383	3.01153	4.6703	4.21614	4.81844	6.47654	3.91499	4.51729	4.51729	5.27232	4.81844	4.51729	4.9713	5.42075	5.7219	4.6703	6.02306	4.81844	5.87441	6.02306	2.72705	4.09058	4.09058	4.25894	7.41656	8.18116	7.88192
1230029	23.72	0.028	44	4.14174	3.07641	2.30731	2.60379	1.83497	2.01237	2.13311	2.78123	3.37274	3.07641	2.90134	3.66993	3.5502	4.43871	3.84551	3.37274	4.20714	4.68313	5.74356	4.68313	6.40287	3.73141	4.68313	7.17054	7.34606	3.33884	6.86913	5.43837	5.43837	3.81582	5.43837	2.86186	3.53092	5.43837	4.76977	4.00774	1.90791	4.96148	3.33884	3.53092	4.4846	3.81582	3.53092	4.29279
1230030	23.11	0.016	38	5.59915	2.5686	3.93325	2.43211	2.26752	1.96663	2.5686	2.5686	1.96663	2.73171	3.93325	2.8698	3.33202	3.33202	3.63255	3.17109	3.93325	3.93325	3.33202	3.63255	3.93325	6.80257	8.02966	5.1372	4.23409	4.09756	8.46819	9.23169	4.83609	9.23169	4.31921	3.07641	3.84551	4.79356	3.84551	3.49855	3.07641	3.19966
1230031	28.63	0.0409	44	4.39751	2.43211	1.96663	3.31147	3.98497	2.43211	4.45406	4.39751	4.19089	6.2117	5.27701	5.53786	4.19089	3.10585	2.84592	5.53786	2.84592	3.98497	4.39751	3.31147	4.45406	4.92466	4.69768	4.71218	6.2007	4.92466	5.77516	5.3498	5.77516	5.77516	4.69768	5.77516	6.43123	5.37102	6.00688	5.79483	5.79483	6.00688	5.1372	4.525	4.49979	7.72644	6.43123	9.87008
1230032	22.11	0.0132	41	3.92167	2.41333	3.17109	2.715	1.50833	1.20667	2.11167	1.81	1.20667	1.81	1.81	1.81	1.81	2.26752	2.715	3.31833	3.01667	3.31833	3.92167	4.07529	5.43	4.05851	4.47952	4.69768	4.69768	3.41297	4.05851	4.47952	4.69768	4.4846	4.0529	4.4846	4.27154	4.69283	4.4846	3.20676	3.83959	3.63255	3.83959	5.55018	3.84551
1230033	19.22	0.0088	43	5.72372	2.38488	2.19617	1.2438	1.43093	2.57744	2.01237	1.90791	2.67277	1.90791	2.10087	3.62628	2.48761	2.10087	3.62628	2.86186	2.67277	3.62628	2.80566	2.17535	2.80566	1.71976	1.93161	3.68231	3.47244	3.22797	3.01667	3.68231	4.10311	3.89255	3.65129	3.26302	2.59504	3.22797	2.59504	2.59504	3.89255	2.14374	1.96663	1.96663	2.59504	1.93161	1.71976
1230034	23.41	0.0216	45	4.69768	2.8698	4.09756	2.26752	2.26752	2.13311	1.20667	1.36585	2.73171	1.66601	2.5686	2.73171	1.96663	2.5686	2.43211	2.48761	2.96341	2.78123	3.37274	3.25604	2.78123	2.96341	3.25604	3.37274	3.73141	3.84551	3.73141	3.07641	2.19617	1.5382	2.48761	2.78123	3.25604	2.78123	3.25604	3.25604	2.78123	3.73141	4.49979	3.73141	2.96341	4.79356	4.20714	3.84551	6.51209
1230036	27.67	0.038	62	6.33141	2.60379	3.25604	3.5502	4.14174	2.48761	2.78123	3.37274	5.26838	2.60379	2.30731	2.01237	3.5502	2.48761	3.5502	6.62638	5.08825	2.78123	3.07641	3.37274	4.02474	3.93325	3.10585	3.47244	3.10585	2.63851	2.17535	2.84592	2.84592	2.84592	2.84592	2.63851	3.72531	4.14174	3.51801	4.14174	4.19089	4.60474	4.60474	3.93325	4.60474	5.22937	5.07033	4.14174	5.07033	4.81251
1230037	28.19	0.0373	51	4.61461	2.78123	2.60379	2.01237	1.5382	1.5382	1.5382	2.01237	1.5382	3.07641	2.30731	2.78123	1.5382	2.30731	3.07641	3.25604	2.60379	3.5502	2.30731	2.78123	3.07641	3.84551	2.78123	4.31921	3.37274	5.03431	3.19966	2.90134	4.43871	5.03431	4.14174	3.96781	4.26621	6.31702	5.43837	3.47244	5.43837	4.56006	7.823	4.3507	4.56006	3.26302	5.6477	3.26302	4.56006	3.26302
1230040	25.56	0.0247	39	5.28132	2.11167	3.47244	3.01667	2.11167	1.50833	1.66601	1.81	2.11167	1.81	2.26752	2.41333	3.77385	2.8698	4.37677	3.77385	4.07529	4.37677	4.67827	5.28132	5.88443	4.37677	3.17109	3.47244	4.11971	4.87357	5.26838	5.54608	3.24905	5.26838	6.4981	4.79356	4.67827	5.74356	4.39751	4.79356	3.44614	6.02201	5.54608
1230041	23.8	0.0201	43	5.1637	2.26752	3.79789	3.17109	3.19966	3.93325	2.43211	2.26752	4.69768	3.33202	2.43211	3.63255	2.73171	2.73171	2.26752	3.03171	2.73171	3.03171	3.03171	4.39751	3.93325	4.39751	3.79789	3.93325	5.46342	4.39751	5.29852	3.79789	4.23409	4.09756	3.79789	3.03171	5.29852	3.93325	3.03171	3.03171	3.49855	3.33202	2.26752	3.49855	5.89988	4.69768	5.1637
1230042	18.71	0.0119	33	4.97521	2.67277	2.30731	1.43093	2.48761	2.78123	2.48761	1.71976	1.2438	1.71976	2.19617	2.48761	2.48761	2.96341	3.07641	2.67277	2.78123	2.48761	2.19617	2.96341	4.49979	2.19617	2.67277	3.07641	4.02474	3.73141	4.49979	5.26838	5.56246	4.31921	4.49979	4.20714	3.5502
1230043	18.52	0.0082	36	4.31921	2.01237	2.48761	2.30731	1.5382	1.83497	1.71976	2.13311	2.30731	3.84551	2.78123	3.84551	2.30731	2.48761	3.5502	4.43871	2.01237	3.25604	3.37274	3.84551	3.25604	3.66993	4.19089	3.72531	3.31147	3.98497	3.05414	3.98497	3.31147	3.05414	3.57574	3.26302	3.57574	3.93325	3.98497	3.72531
1230045	23.46	0.0256	48	6.01067	4.76977	1.90791	1.90791	1.5382	1.90791	2.10087	2.01237	2.57744	3.14949	2.96341	3.05414	5.53376	8.01832	3.05414	3.10585	2.84592	2.17535	2.84592	3.51801	4.19089	5.02073	3.72531	3.77987	3.05414	3.51801	3.51801	4.14174	4.60474	4.10311	3.62628	3.91586	3.81582	5.92681	4.29279	3.73141	4.39233	5.05686	4.8689	6.5885	6.29899	5.82225	4.68313	4.10311	2.67277	3.14949
1230046	24.88	0.0257	49	5.92681	1.90791	2.78123	2.19617	1.71976	2.19617	1.2438	1.71976	2.38488	2.48761	2.48761	3.43953	4.39233	3.91586	2.67277	2.19617	3.25604	2.67277	3.43953	4.8689	2.19617	2.96341	4.20714	2.38488	3.91586	3.07641	2.78123	3.25604	3.5502	3.84551	2.48761	3.84551	4.31921	2.78123	4.02474	3.5502	4.14174	4.79356	7.10039	5.85731	4.31921	4.81251	4.65877	3.10585	4.19089	2.63851
1230048	25.5	0.0312	47	5.20757	3.5502	2.60379	2.60379	3.84551	2.30731	1.06655	1.5382	2.01237	1.83497	2.60379	2.30731	2.60379	3.07641	2.60379	2.01237	3.37274	2.60379	3.07641	3.84551	3.84551	4.91078	4.61461	3.37274	3.26302	4.39751	3.72531	4.14174	5.27701	4.14174	5.4842	3.93325	2.84592	2.63851	2.84592	2.63851	2.84592	2.84592	3.72531	3.05414	3.37274	3.31147	2.43211	4.45406	2.63851	4.04728
1230049	17.88	0.0063	35	3.24905	2.10087	2.38488	2.38488	2.10087	2.77304	1.43093	2.29743	2.10087	2.57744	1.90791	2.57744	2.57744	2.57744	1.90791	3.05414	3.24905	2.38488	2.97107	4.4846	3.05414	4.67827	4.00774	3.72531	3.72531	5.15488	4.00774	3.24905	3.53092	2.38488	3.53092	3.05414	2.97107	3.53092	3.53092
1230051	18.62	0.0062	40	5.12833	2.63851	2.63851	2.90134	2.22703	2.43211	1.759	2.02364	2.02364	1.55292	1.759	1.55292	2.22703	1.96663	2.22703	2.69819	2.63851	2.90134	3.31147	2.63851	2.69819	1.55292	2.43211	3.98497	2.90134	2.90134	2.63851	2.22703	3.10585	2.22703	2.63851	2.43211	2.22703	2.90134	2.14374	3.41963	3.20676	2.35609	3.86322	5.3498
1230052	26.27	0.0234	41	5.98791	1.93161	3.41963	2.13311	2.5686	3.63255	3.41963	3.41963	2.99396	2.78123	2.78123	2.35609	3.20676	3.63255	3.47244	4.37677	4.82667	4.82667	4.97979	4.82667	3.62	4.37677	3.31833	5.28132	3.92167	3.92167	8.29721	4.525	3.31833	4.37677	6.93833	6.78918	4.97979	3.92167	5.28132	5.12833	3.77385	5.12833	5.58287	8.59882	7.54167
1230053	21.26	0.0126	38	5.56246	3.25604	2.48761	3.66993	2.01237	2.30731	2.96341	2.60379	3.5502	3.25604	2.78123	2.13311	2.19617	2.90134	2.78123	2.48761	3.07641	3.5502	3.5502	4.79356	3.07641	3.07641	3.25604	3.37274	4.02474	4.02474	2.60379	3.5502	3.25604	3.07641	4.02474	3.66993	2.19617	4.14174	2.78123	3.5502	4.79356	4.31921
1230055	26.24	0.0289	42	5.1239	2.5686	1.9198	2.55973	3.41963	2.13311	3.63255	3.63255	2.77304	3.20676	2.5686	2.55973	2.34642	3.63255	3.41963	4.4846	4.0529	4.27154	4.05851	5.76333	5.9765	4.27154	5.1239	5.55018	4.91078	5.76333	4.69768	4.27154	4.69768	4.91078	5.9765	5.33703	6.18968	5.1239	5.9765	3.84551	5.54608	3.62628	6.61263	4.05851	7.46587	5.11945
1230056	20.8	0.011	37	5.59242	1.92308	2.14741	2.36012	3.65753	4.29482	2.78598	2.57299	2.14741	2.14741	2.36012	2.36012	2.14741	3.02182	2.14741	2.14741	2.78598	2.57299	1.7227	1.93491	3.47838	1.20873	3.17651	3.32401	3.17651	2.71964	3.47838	2.57299	2.71964	3.17651	3.32401	4.68626	3.7803	5.59242	5.29035	4.68626	6.80078
1230057	24.01	0.022	35	5.90996	4.56785	2.85078	3.47838	2.64302	2.17907	2.85078	2.59947	3.05936	2.43627	3.47838	4.82073	4.35814	3.93998	3.73168	5.02932	3.47838	4.35814	4.14882	5.02932	4.82073	4.82073	3.47838	4.35814	3.93998	3.33771	3.80438	3.33771	3.93998	4.70571	4.70571	3.50453	3.33771	5.77319	4.70571
1230058	20.41	0.0176	44	5.57336	3.76742	2.10807	1.50576	2.26366	2.71038	1.96328	3.31268	1.96328	2.10807	2.56422	1.50576	2.71038	1.96328	3.31268	2.86491	2.71038	4.06835	3.16569	4.21614	3.16569	4.36931	4.09612	3.2013	4.72819	4.30659	3.64507	3.2013	2.59061	4.28019	2.80088	2.98886	3.43367	2.17164	3.43367	3.64507	3.4138	3.43367	3.64507	3.01153	3.01153	2.56422	2.59061	2.35208
1230059	22.16	0.019	44	4.99347	2.97107	2.29743	1.14871	1.34909	2.49674	1.43093	1.34909	2.49674	3.17109	3.17109	3.64505	1.90791	3.37274	2.77304	2.97107	3.37274	3.24905	2.90134	3.64505	2.97107	3.92167	4.11971	3.17109	3.37274	4.11971	5.33703	3.19966	4.91078	3.84551	4.47952	4.4846	4.69768	4.4846	7.2557	4.69768	7.04248	6.82927	4.26621	4.4846	3.41963	6.18968	5.76333	5.9727
1230060	26.06	0.0314	47	5.98672	2.31125	3.20513	1.8381	2.9063	1.8381	3.67621	2.78598	3.50453	2.60824	2.9063	3.67621	3.08167	4.14882	4.2735	5.51431	3.3785	4.44629	5.21648	4.44629	4.2735	4.14882	4.14882	2.9063	2.60824	3.67621	5.04292	4.91917	6.6377	4.27884	4.27884	6.2113	5.78504	4.91917	4.06545	4.91917	5.14598	5.34615	3.42547	2.78598	2.14741	2.77778	2.99907	3.85208	5.99815	3.63876
1230061	19.22	0.0086	33	4.39751	3.03171	3.33202	1.66601	1.66601	3.03171	1.66601	1.36585	2.8698	3.79789	3.33202	3.33202	3.33202	3.03171	3.63255	2.69819	4.25018	3.57574	3.98497	2.90134	4.25018	3.57574	4.45406	3.57574	4.25018	3.77987	4.04728	3.98497	2.90134	3.17109	3.10585	2.69819	2.63851
1230062	18.39	0.0094	37	5.34188	2.9063	2.43627	2.0271	2.0271	2.23083	1.76201	2.7028	2.9063	1.55558	3.11116	2.23083	3.11116	1.06838	2.11528	1.36819	3.02182	2.87471	2.2714	3.47838	3.7803	4.68626	3.47838	3.47838	3.63876	2.41746	3.17651	3.17651	2.87471	4.08226	3.47838	4.08226	4.24133	3.7803	3.7803	4.9883	5.74941
1230063	22.97	0.0158	49	3.84551	2.22703	3.17109	2.29743	1.82253	1.55292	1.34909	1.34909	1.62452	1.82253	1.55292	2.10087	1.55292	1.82253	2.02364	1.82253	2.13311	3.37274	2.13311	3.66993	3.66993	4.26621	4.26621	4.43871	3.66993	3.96781	4.04728	5.59915	3.57574	4.92466	5.12833	4.25018	4.25018	4.25018	5.59915	2.90134	2.86186	2.57744	3.53092	3.53092	4.00774	3.53092	3.53092	3.53092	2.86186	2.57744
1230065	24.84	0.0328	43	6.84094	4.10457	2.73638	1.96999	2.43627	3.0369	2.43627	3.0369	2.43627	2.2714	3.20513	2.2714	3.80438	2.73638	3.80438	3.63876	4.57285	3.63876	5.17253	4.10457	3.17651	6.37454	4.40503	6.07379	8.34428	7.06422	6.20026	5.14598	2.99145	3.21224	4.70571	4.49226	4.93308	5.13265	3.85208	4.27884	6.42449	4.91917	5.079	4.61261	4.82073	5.90996	5.95997
1230066	17.18	0.0102	33	3.05414	2.96341	2.57744	2.48761	2.38488	2.38488	1.71976	1.14871	1.90791	2.01237	2.57744	2.38488	2.19617	2.38488	2.96341	3.53092	4.10311	4.39233	2.57744	2.90134	2.13311	2.01237	2.13311	1.5382	2.90134	2.90134	4.73626	3.37274	3.37274	3.19966	4.91078	4.43871	3.19966
1230067	14.02	0.0051	32	5.67749	2.501	2.30135	1.3514	1.6273	1.82564	1.15068	1.3514	2.0271	2.0271	2.97615	1.82564	1.3514	2.10446	2.0271	1.3514	1.82564	2.10446	1.82564	1.55558	3.17651	2.10446	3.58185	2.10446	2.501	1.82564	2.501	1.55558	1.15068	2.97615	3.45203	3.3785
1230068	22.36	0.0173	43	4.14174	3.66993	3.37274	2.90134	2.90134	1.83497	2.30731	2.13311	1.83497	2.30731	2.13311	2.60379	2.30731	3.19966	3.07641	3.19966	2.60379	2.90134	2.60379	4.26621	3.37274	3.66993	3.66993	4.26621	5.20757	6.10083	4.43871	4.43871	5.03431	5.03431	5.56246	5.26838	4.79356	4.79356	3.5502	4.49979	4.31921	4.49979	3.5502	3.73141	3.25604	6.80591	5.08825
1230069	24	0.018	41	4.79356	3.14949	2.96341	1.83497	2.96341	2.19617	2.30731	2.19617	2.19617	2.01237	2.01237	2.19617	1.5382	4.68313	2.78123	2.96341	4.49979	3.43953	2.96341	5.26838	3.91586	4.79356	3.91586	4.97521	5.26838	4.20714	3.41297	4.91078	5.54608	4.05851	3.41297	3.20676	5.33276	3.62628	4.27154	2.98635	3.84551	3.19966	4.0529	7.04248	4.69768
1230071	22.42	0.0159	39	7.86651	3.47244	3.03171	3.93325	2.8698	2.26752	2.5686	2.26752	1.66601	3.03171	1.50833	3.03171	2.26752	2.8698	2.73171	3.47244	3.93325	3.33202	4.23409	4.53505	4.23409	3.93325	4.71218	3.43953	3.20676	3.86322	4.28749	3.86322	4.05851	3.65129	4.07529	5.55018	5.33703	4.69768	4.27154	4.69768	5.1239	4.69768	4.05851
1230072	27.6	0.0364	51	5.16811	2.67734	4.21433	2.19992	2.78598	3.15488	2.31125	1.7227	1.7227	1.7227	2.67734	3.08167	4.87723	2.01581	1.43338	2.01581	2.96847	2.49186	3.26161	2.67734	3.73779	2.67734	3.73779	3.26161	4.69113	4.39984	5.27739	3.92256	4.69113	5.93694	5.46023	5.27739	6.12246	5.16811	4.80175	5.93694	4.21433	3.44541	4.39984	6.70613	4.98372	4.69113	4.69113	5.75338	4.69113	4.72024
1230073	24.23	0.0221	53	6.18601	3.01667	1.96663	1.50833	1.50833	1.66601	1.50833	1.81	1.81	1.66601	2.11167	1.81	2.11167	2.5686	3.01667	2.26752	2.11167	2.715	1.66601	2.11167	2.11167	2.8698	3.62	3.47244	2.715	4.37677	3.77385	3.92167	4.07529	3.92167	4.37677	4.97979	4.69768	3.03171	2.8698	3.63255	2.73171	3.17109	4.23409	3.33202	2.73171	3.93325	3.47244	3.03171	3.63255	4.23409
1230075	16.32	0.0061	31	6.02201	3.05414	3.72531	2.29743	2.57744	1.62452	1.82253	2.77304	1.90791	3.44614	3.24905	2.10087	2.77304	2.97107	3.05414	3.05414	3.64505	2.57744	3.05414	3.81582	3.05414	2.57744	3.05414	3.05414	2.10087	1.90791	3.05414	1.90791	2.57744	2.57744	2.77304
1230076	21.52	0.0125	41	5.82225	2.67277	4.10311	1.43093	1.71976	1.90791	3.25604	2.38488	2.96341	3.33884	2.19617	3.14949	3.43953	4.10311	2.48761	3.81582	4.20714	3.91586	3.81582	3.62628	3.73141	3.81582	2.96341	4.31921	3.73141	3.5502	4.02474	4.02474	4.79356	3.73141	3.5502	2.78123	2.48761	2.48761	3.84551	4.49979	4.02474	4.02474	3.73141	3.84551	3.73141
1230077	22.36	0.0158	37	6.40287	3.33884	3.25604	1.71976	2.86186	2.48761	2.19617	1.71976	2.67277	2.67277	2.48761	2.48761	3.14949	3.43953	3.43953	3.62628	5.15929	4.8689	4.20714	3.62628	3.62628	2.43211	2.80566	2.43211	4.14174	3.93325	3.05414	3.51801	2.80566	3.05414	2.84592	3.93325	3.72531	3.05414	3.72531	3.05414	3.47244
1230079	24.39	0.0306	46	8.38915	4.19457	2.76831	2.09729	3.04894	2.49248	3.71896	2.38082	3.44027	2.38082	3.71896	4.86527	2.09729	3.24351	2.09729	2.29351	2.85699	4.26426	4.046	4.47696	6.17914	4.68968	3.62636	5.54072	4.47696	5.54072	5.54072	4.26426	4.046	3.62636	4.0516	3.62636	4.046	4.68968	4.26426	5.54072	2.98886	4.25894	4.90241	3.62636	3.40716	4.47189	5.32794	4.046	6.60136	6.81764
1230080	22.24	0.0207	48	6.20842	2.00894	2.19243	2.48337	2.48337	2.48337	2.59935	1.71684	2.00894	2.19243	1.71684	2.00894	1.71684	1.24168	1.53558	2.19243	3.07117	4.67515	4.01788	4.19998	3.72505	3.2505	4.01788	3.43367	5.25941	2.95836	5.25941	4.67515	3.54415	3.90919	4.01788	4.01788	2.95836	3.43367	4.01788	2.48337	3.2505	3.43367	3.54415	3.2505	4.96674	3.90919	3.83896	3.43367	6.20842	4.01788
1230082	19.93	0.01	35	6.19658	2.2714	1.81309	1.66886	1.51091	1.20873	1.51091	1.96999	1.81309	3.17651	1.81309	2.2714	2.71964	2.2714	4.38425	2.71964	3.47838	4.38425	4.68626	3.62619	3.47838	4.68626	4.08226	4.84435	3.63876	3.63876	4.84435	3.93998	3.93998	4.24133	5.14598	6.97642	4.24133	8.7841	8.48266
1230083	24.57	0.0219	51	7.81838	3.2505	2.66822	2.00894	2.19243	2.48337	1.71684	2.48337	1.71684	2.19243	1.90466	1.83184	3.43367	2.38082	2.00894	2.00894	2.85699	2.48337	2.00894	2.55537	2.34242	3.40716	3.19421	3.40716	3.6201	2.98886	3.6201	3.19421	3.19421	3.6201	2.98126	2.98886	4.68968	4.91627	3.62636	4.47696	4.06835	5.11517	4.06835	4.0516	4.0516	2.77649	3.4138	2.98886	3.62636	3.83896
1230084	26.38	0.0306	57	4.525	2.38488	2.59504	2.14374	1.96663	1.93161	1.50833	1.29752	1.71976	1.93161	1.759	2.14374	3.01667	2.80566	3.26302	2.35609	2.59504	2.80566	3.01667	3.68231	3.86322	4.10311	3.26302	4.31394	3.25604	2.01237	2.67277	2.01237	2.48761	2.48761	2.67277	2.78123	2.96341	3.25604	3.91586	4.79356	4.39233	4.97521	4.97521	5.26838	4.26621	5.20757	2.90134	3.66993	5.63156	5.03431
1230085	21.8	0.0093	32	4.11012	3.15488	2.49186	1.91117	1.91117	1.7227	1.43338	2.49186	3.15488	2.67734	5.8322	1.43338	2.96847	2.67734	2.86675	2.67734	4.5878	4.69113	4.69113	4.03162	5.46023	4.98372	5.46023	4.50748	4.50748	5.75338	3.92256	4.21433	6.01715	4.74436	6.01715	6.44223
1230086	22.51	0.0147	43	4.68968	2.12947	2.26366	2.26366	1.83184	2.86491	1.83184	1.66317	2.56422	1.66317	2.12947	2.72705	1.66317	2.26366	1.66317	1.36353	1.96328	1.96328	1.66317	1.83184	2.26366	2.12947	4.22688	3.32634	2.72705	3.32634	3.79142	3.32634	2.26366	3.79142	6.0531	4.68968	4.22688	4.09058	3.02655	5.58961	4.82785	4.52732	4.9713	5.12845	3.76742	6.03058	4.06835
1230088	21.79	0.0153	43	5.73378	3.07117	2.48337	2.30338	2.19243	2.30338	2.00894	2.30338	2.19243	2.30338	2.00894	2.00894	2.30338	2.48337	2.77649	3.07117	3.72505	4.31185	3.72505	5.07958	5.25941	3.6201	4.046	4.47189	4.47696	3.6201	4.25894	3.83305	4.68484	5.11073	3.83305	4.90241	3.6201	4.47189	3.19421	4.25894	3.83305	3.19421	4.046	4.26426	3.6201	3.83305	4.25894
1230089	22.6	0.0159	40	4.47696	4.28019	4.0516	2.55537	1.92832	1.27768	1.92832	2.77649	2.34242	2.14009	2.14009	3.2013	3.19421	2.56422	2.77649	3.79142	3.79142	3.49259	4.09058	5.92054	4.85594	3.19421	3.49259	4.39002	5.15491	3.79142	4.85594	4.55727	3.79142	3.79142	4.25894	3.79142	2.42797	3.79142	3.49259	2.40922	2.86491	3.76742	3.91499	4.36931
1230090	21.56	0.0138	38	4.9883	3.17651	3.7803	3.17651	3.47838	2.41746	1.96999	1.81309	2.87471	2.57299	2.41746	2.57299	3.17651	2.71964	3.7803	2.87471	4.38425	3.7803	2.57299	5.49357	4.19805	4.40503	3.99178	3.52402	4.87254	3.52402	3.99178	3.73168	3.31713	3.31713	2.9063	3.93998	4.46167	3.73168	2.85078	3.58185	3.93998	3.78633
1230091	20.54	0.009	34	4.91627	3.16569	4.04039	2.02019	1.55028	1.55028	1.81942	1.81942	1.75601	2.02019	4.28548	2.57305	2.09729	1.90466	3.24351	1.90466	2.57305	2.29351	4.00091	2.38082	3.44027	4.00091	3.80932	3.44027	3.5249	2.85699	3.71896	3.71896	5.42911	3.5249	3.5249	3.04894	3.71896	4.95303
1230092	21.27	0.013	37	6.59976	3.15488	2.67734	2.19992	2.86675	2.49186	3.15488	2.96847	2.67734	2.38896	3.44541	3.34455	3.15488	4.39984	3.92256	4.12675	4.80175	4.5277	5.47693	5.00201	5.079	5.47693	5.9523	3.3785	4.80175	4.32659	2.78598	4.6225	3.08167	3.26161	3.08167	2.31125	4.03162	3.08167	3.55626	6.16334	5.09695
1230093	22.5	0.0179	48	7.75139	2.72705	1.83184	1.66317	2.42797	2.12947	2.89639	2.72705	1.83184	2.42797	2.12947	2.12947	2.42797	2.12947	2.49248	1.81942	2.09729	1.62176	1.81942	3.91499	3.04894	3.63884	3.5249	4.11269	3.44027	3.71896	3.44027	4.11269	4.19457	3.44027	2.76831	3.91499	4.39002	2.76831	2.96601	3.71896	3.44027	4.58702	3.71896	3.24351	3.44027	2.96601	3.24351	4.58702	2.57305	2.57305
1230094	24.54	0.0286	44	8.53509	4.26621	2.34642	2.13311	1.27986	1.27986	2.35609	1.70648	2.77304	1.9198	3.41297	2.14374	2.98635	3.83959	4.69283	3.41963	3.41297	4.47952	2.98635	5.33703	5.9727	5.76333	4.47952	5.54608	4.27154	3.62628	5.26838	4.61461	4.79356	3.25604	3.5502	4.49979	4.91078	4.02474	5.08825	3.43953	3.07641	4.61461	4.02474	5.26838	6.62638	6.51209	5.56246	7.10039
1230095	19.87	0.0098	33	5.34069	2.98886	4.06835	3.4138	2.98886	2.35208	2.35208	2.14009	2.14009	2.35208	1.71684	3.2013	2.98886	4.06835	2.34242	4.06835	2.77649	3.43367	3.4138	2.14009	3.66368	2.59935	3.19421	2.59935	4.90241	2.89639	3.49259	3.07117	2.59935	4.25894	3.36699	3.66368	5.49552
1230099	17.48	0.0058	29	6.97544	2.30338	2.95836	2.19243	3.07117	4.38485	2.59935	2.48337	1.24168	1.90466	2.30338	2.48337	2.48337	2.95836	2.30338	2.95836	2.77649	2.19243	2.77649	1.71684	2.38082	2.30338	2.66822	2.00894	2.19243	2.00894	3.43367	2.95836	4.96674
1230100	24.22	0.0274	44	4.91078	3.20676	2.13311	2.34642	1.71976	1.70648	2.35609	1.49317	3.19966	2.73171	2.43211	2.90134	2.43211	3.79789	2.43211	2.43211	1.83497	3.03171	3.49855	3.19966	3.79789	3.49855	3.19966	5.1637	4.56505	2.90134	4.09756	3.49855	4.56505	4.56505	4.09756	3.79789	3.96781	4.09756	4.56505	3.49855	2.73171	2.73171	3.49855	3.49855	4.09756	5.33276	6.22998	7.29634
[truncated: 16 more columns]
